# Supplementary material
Source: publisher figshare collection journal article supplement (https://frontiersin.figshare.com/ndownloader/files/15743444)
Supplement: Supplementary file [file 15743444]

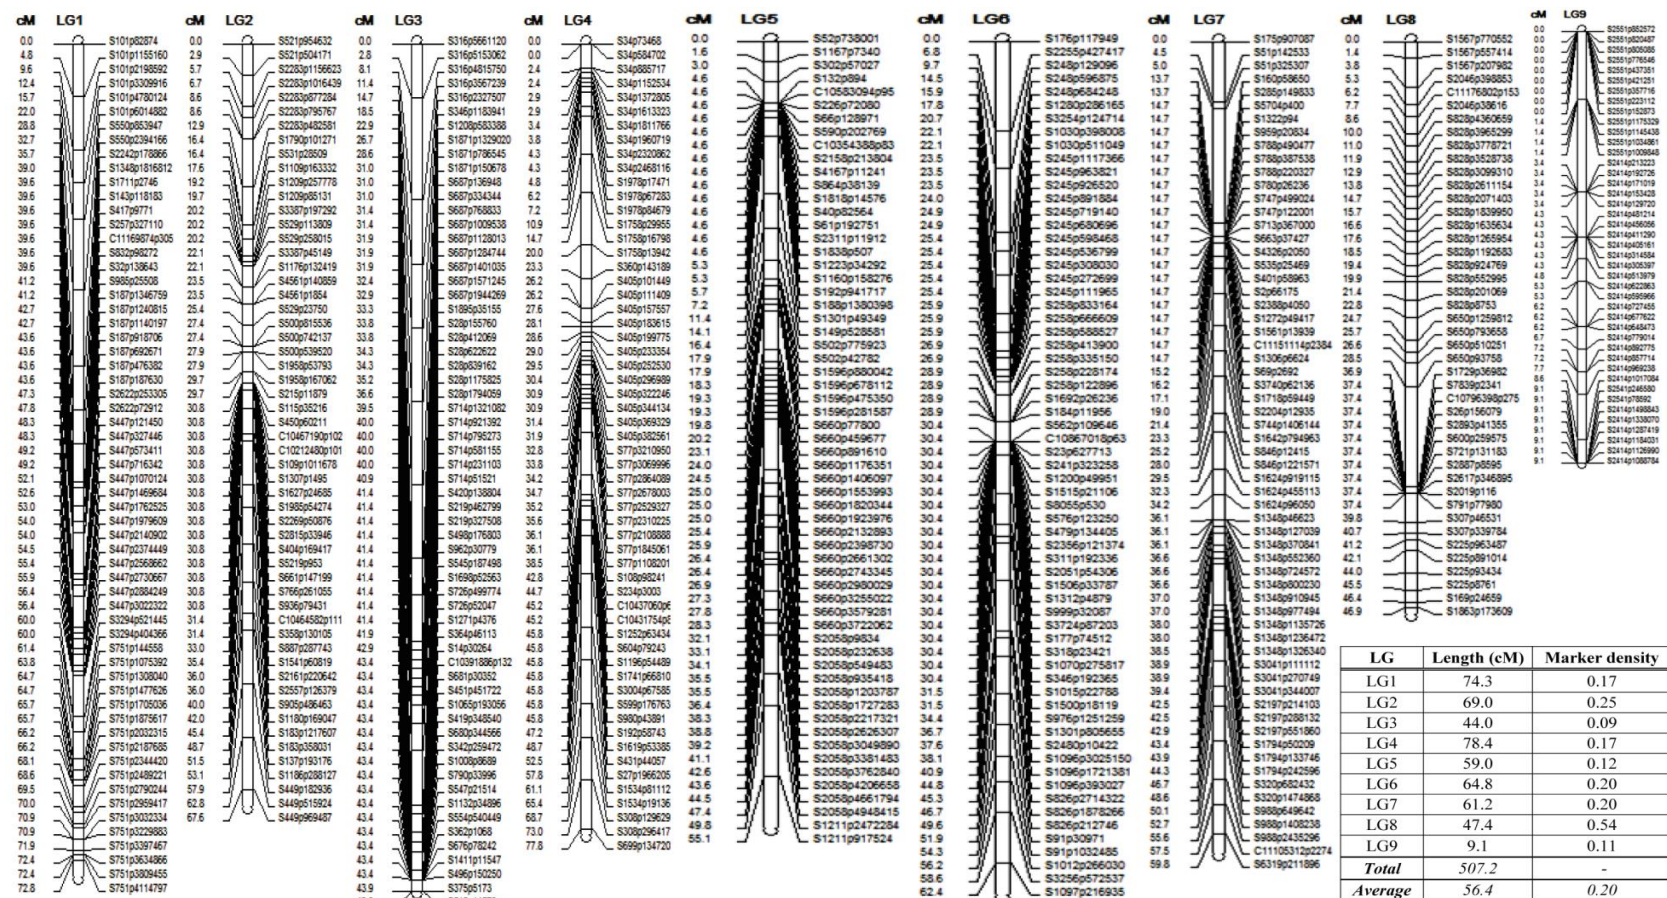

**Supplementary Figure 1.** High density linkage map of the chickpea interspecific population CRIL2, ICC4958 (*Cicer arietinum*) x PI489777 (*Cicer reticulatum*), which was used to select a subset of markers to construct genetic maps with the HRM markers designed in this study (Figure S4). The high density map is based on 2956 RAD-GBS SNP markers genotyped in 107 RIL lines (von Wettberg et al. 2018). It comprised nine linkage groups, with a total map length of 507.2cM. The map length of each linkage group varied from 9.1cM (LG9) to 78.4cM (LG4) with an average of 56.36cM (Inset table). A total of 2,956 markers were mapped on all of the 9 linkage groups. The number of markers mapped on an individual linkage group varied from 86 (LG9) to 495 (LG3) with an average of 328.44 markers/LG.

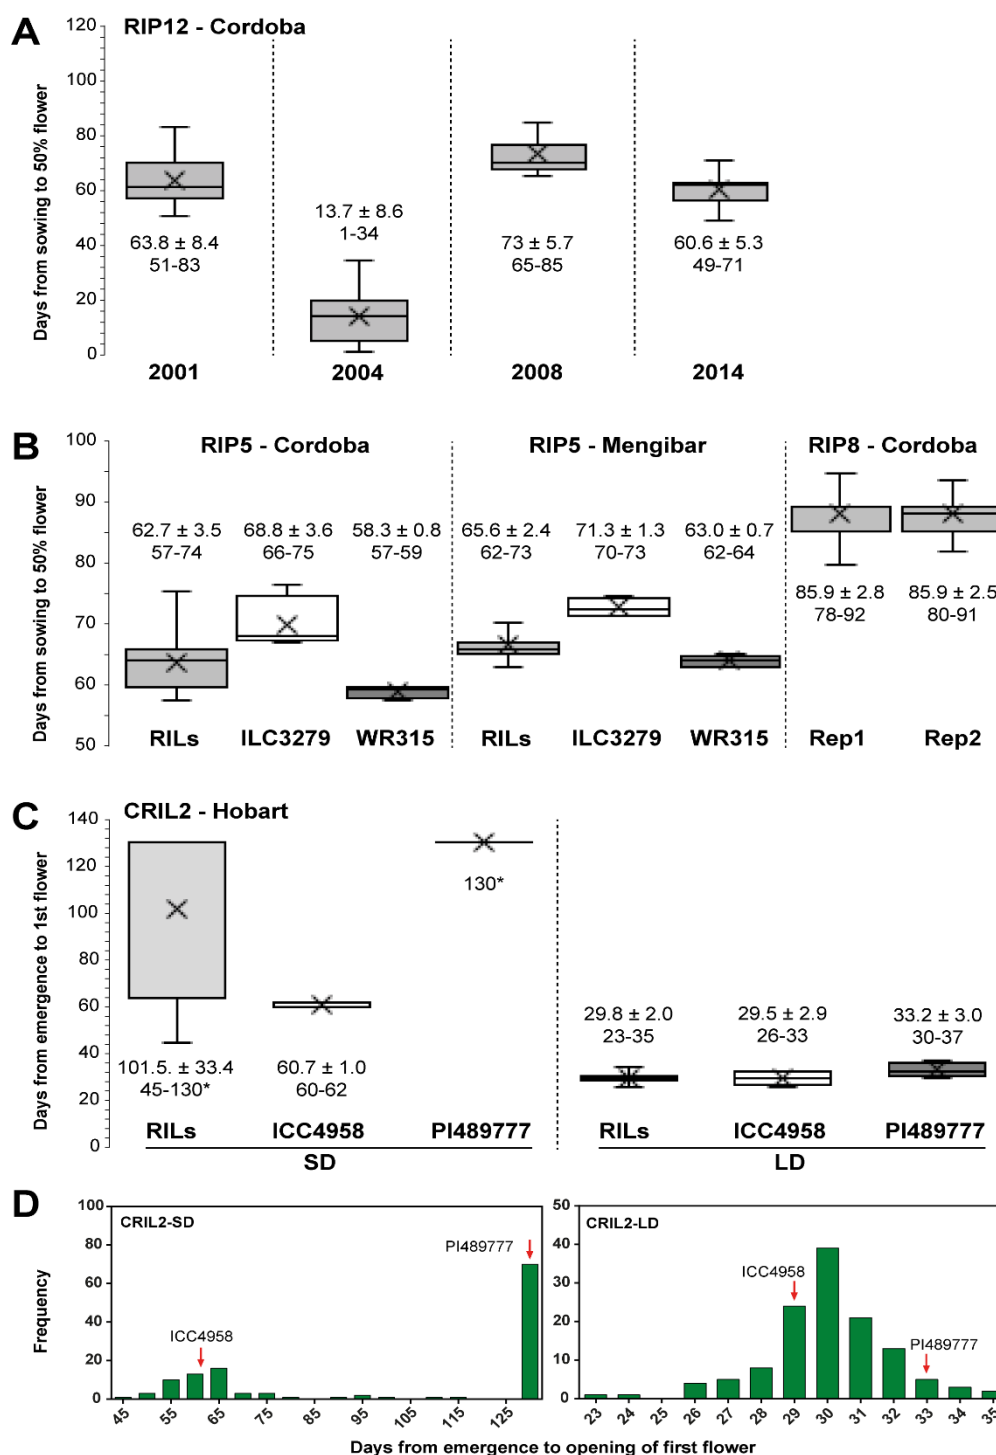

**Supplementary Figure 2.** Boxplot illustrating the variation in flowering time obtained in different environments for RIP12 (**A**), RIP5/RIP8 (**B**) and CRIL2 (**C**). Note that for RIP12, the flowering values during the 2004 season are relative: the date of the first visible flower in any RIL of the population was considered as day 1 and used as reference for the rest of the population. Box edges denote the lower and upper quantiles with mean (cross) and median (line) values in the middle of the box. Numbers under the boxes correspond to mean  $\pm$  standard deviation and range (minimum-maximum value). (**D**) Frequency distribution of flowering time variation measured in CRIL2 parents and RILs grown under long (LD) and short days (SD). Red arrows indicate the phenotypic values of the parental lines.

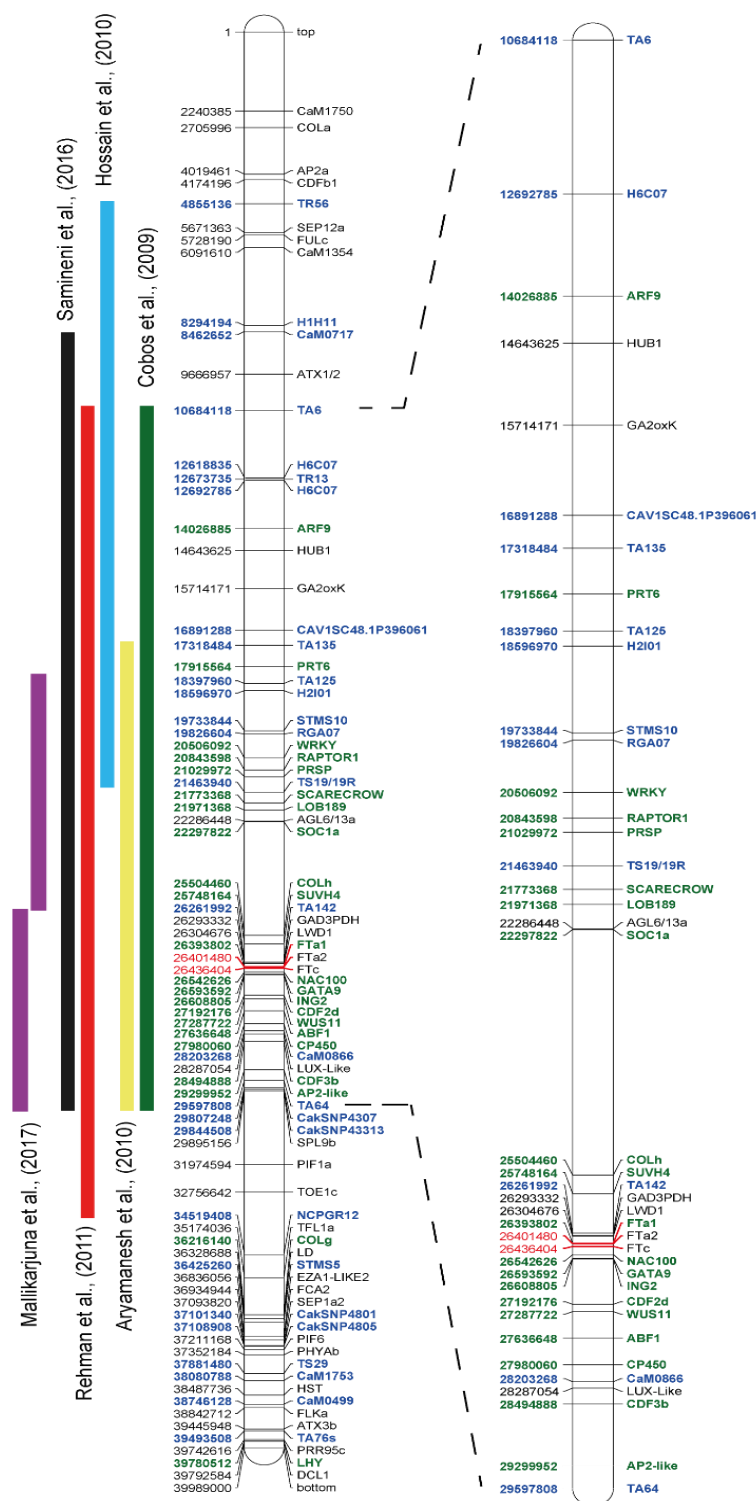

**Supplementary Figure 3.** Representation of the chickpea chromosome 3 and the region between markers TA6 and TA64, summarizing the different flowering QTL (vertical coloured bars) described to date in the region (Aryamanesh et al. 2010; Cobos et al. 2009; Mallikarjuna et al. 2017; Rehman et al. 2011; Samineni et al. 2016). Numbers on the left of the linkage group indicate physical position in bp, according to the genome assembly of cultivar CDC Frontier (ASM33114v1; Varshney et al., 2013). Interesting markers from previous reports are shown in blue and markers designed for this study are shown in green. Other interesting flowering-related genes are shown in black while the cluster of *FT* genes is highlighted in red.



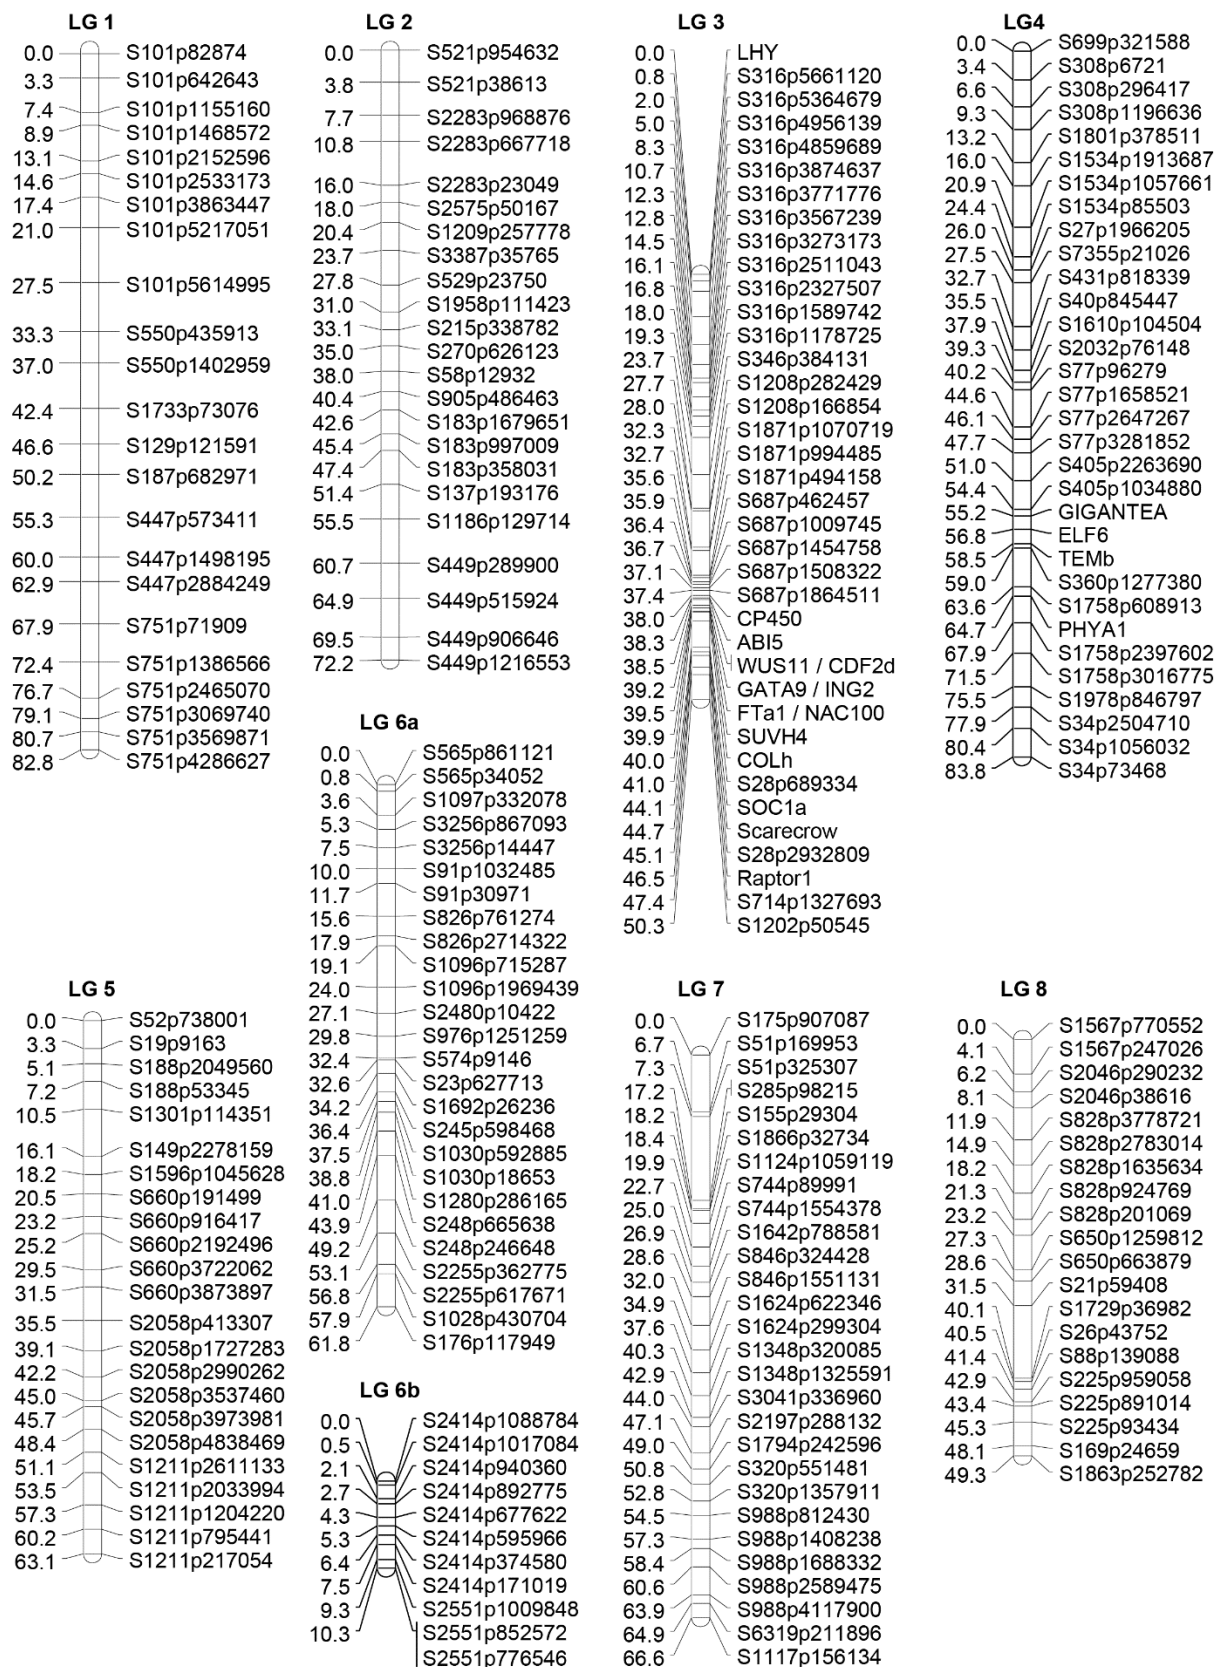

**Supplementary Figure 4.** Genetic linkage map constructed for CRIL2 (ICC4958 x PI489777). Numbers on the left of each linkage group represent the absolute distances in cM. The map comprises a total of 226 markers, grouped in 9 linkage groups covering a total distance of 540 cM, with an average inter-marker distance of 2.4 cM.

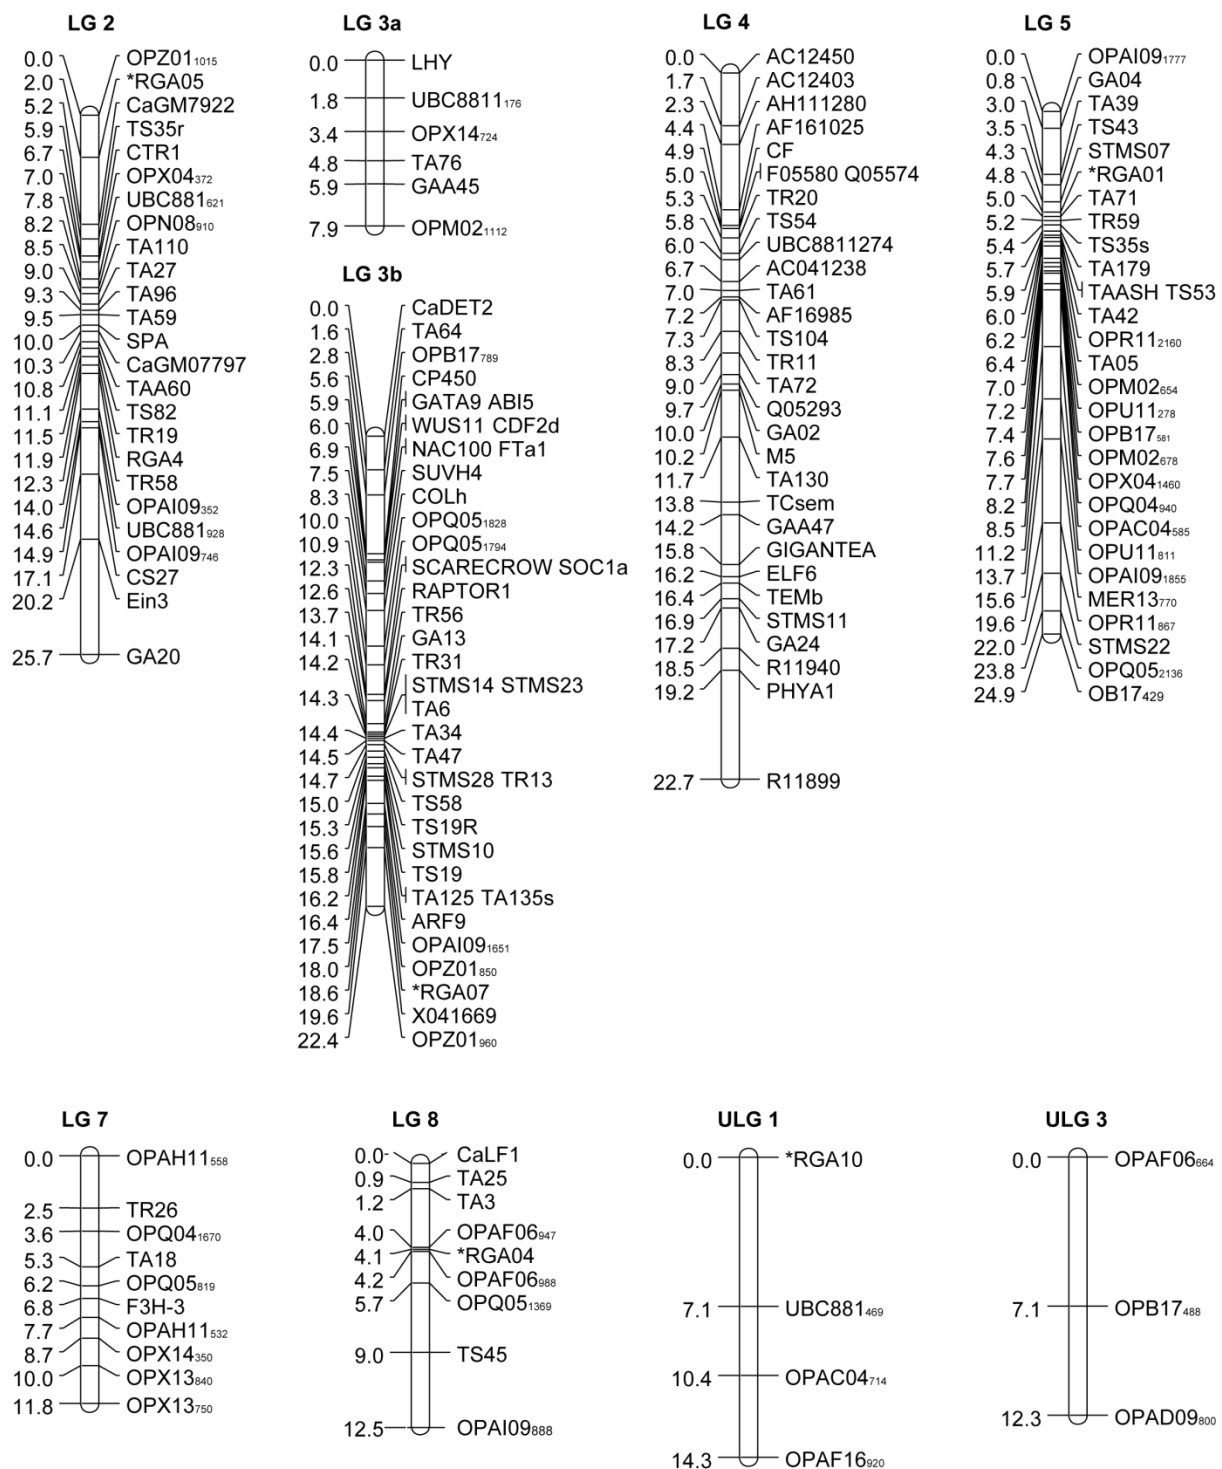

**Supplementary Figure 5.** Genetic linkage map constructed for RIP12 (ICCL81001 x Cr5-9). Numbers on the left of each linkage group represent the absolute distances in cM. The map comprises a total of 155 markers, grouped in 9 linkage groups covering a total distance of 154.5 cM, with an average inter-marker distance of 1.05 cM.

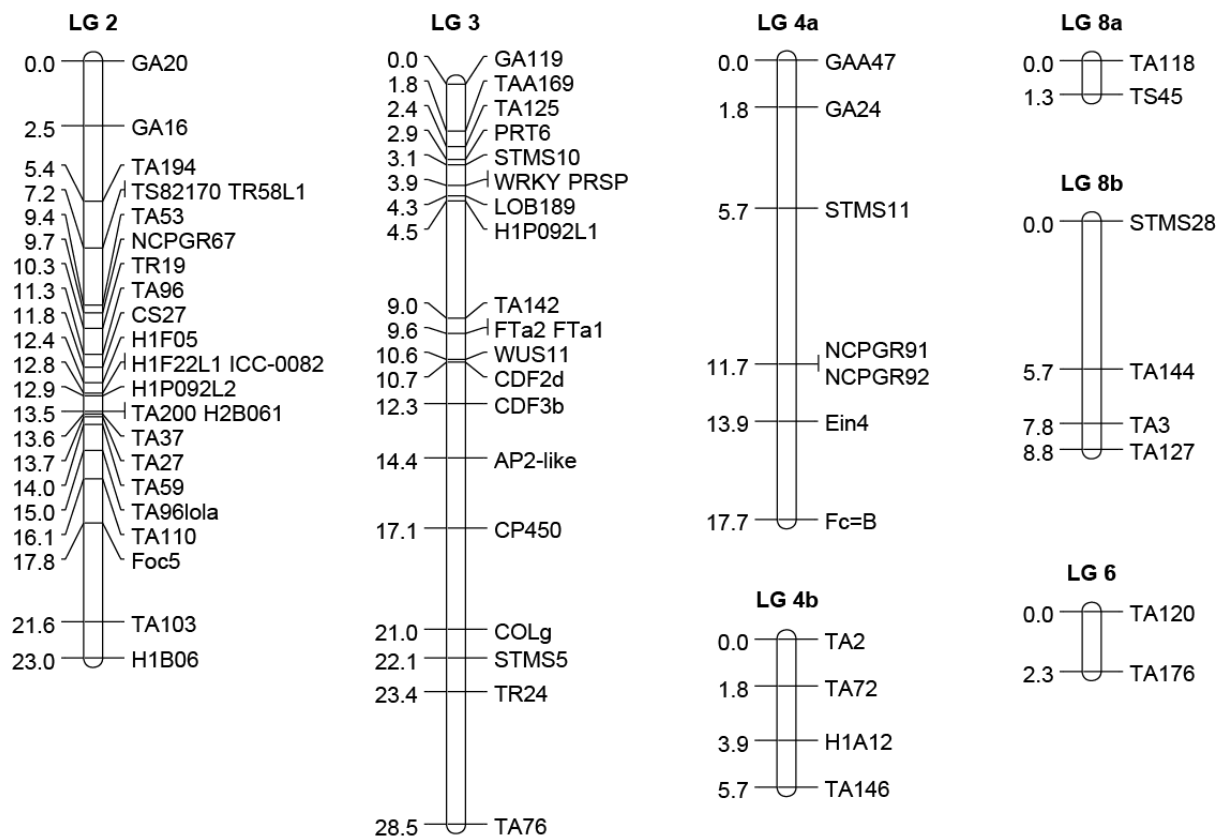

**Supplementary Figure 6.** Genetic linkage map constructed for RIP5 (WR315 x ILC3279). Numbers on the left of each linkage group represent the absolute distances in cM. The map comprises a total of 64 markers, grouped in 7 linkage groups covering a total distance of 87.3 cM, with an average inter-marker distance of 1.53 cM.

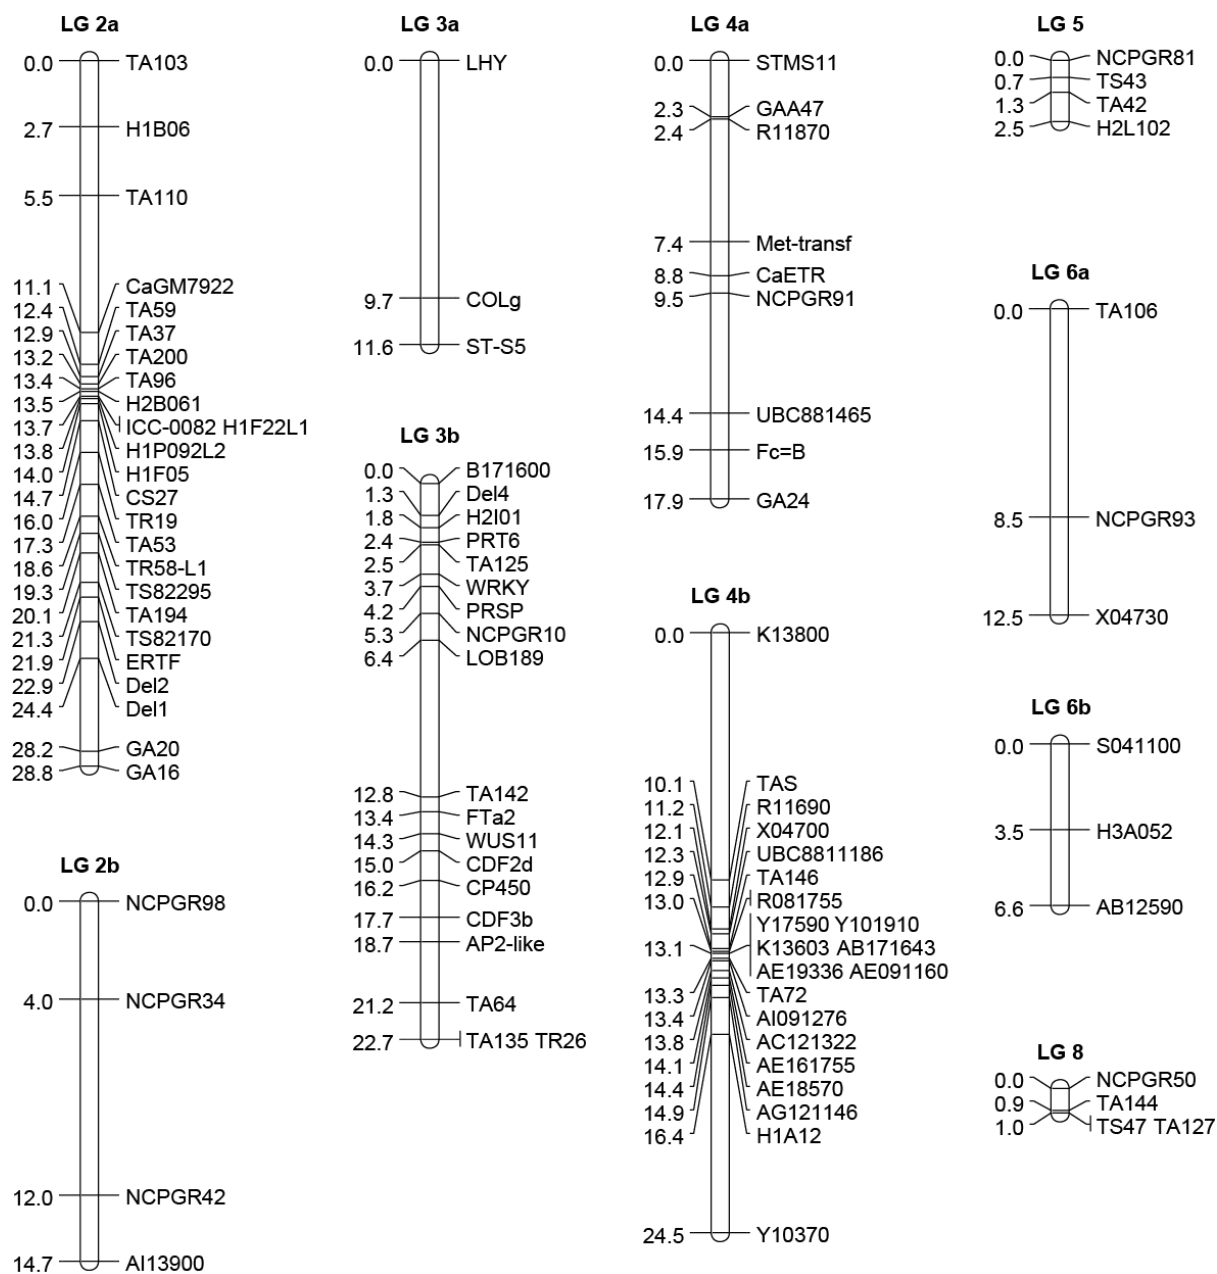

**Supplementary Figure 7.** Genetic linkage map constructed for RIP8 (ILC3279 x WR315). Numbers on the left of each linkage group represent the absolute distances in cM. The map comprises a total of 95 markers, grouped in 10 linkage groups covering a total distance of 142.7 cM, with an average inter-marker distance of 1.76 cM.

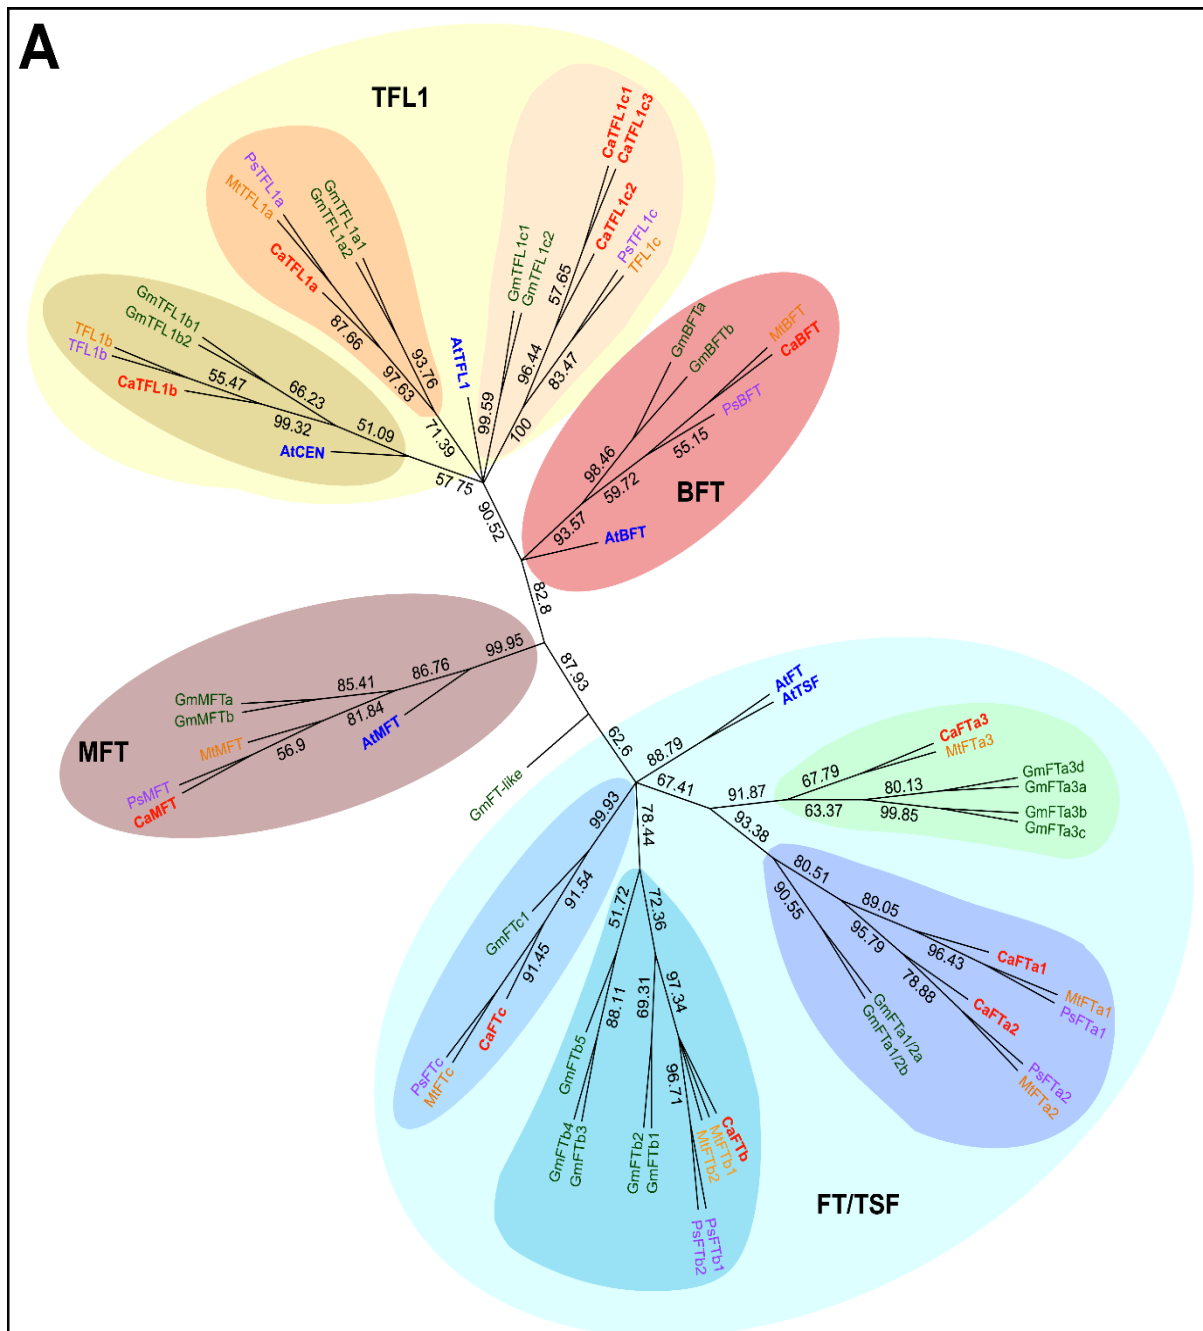

**Supplementary Figure 8. (A)** Maximum parsimony tree derived from the alignment of phosphatidylethanolamine-binding proteins (PEBP) in *Arabidopsis thaliana* (At, blue), *Cicer arietinum* (Ca, red), *Glycine max* (Gm, green), *Pisum sativum* (Ps, purple) and *Medicago truncatula* (Mt, orange). Accession number of the PEBP genes can be found in Supplementary Table 4. Sequences were aligned with MAFFT (full alignment can be found in Supplementary Figure 9) and the tree was built using PAUP\* in Geneious 8 software. Numbers beside branches represent bootstrap support from 1000 replications. **(B)** In next page; Position of the PEBP genes (in red) in the chickpea reference genome. Bars represent chromosomes, with numbers indicated on top. *BFT* and *TFL1c1* are not included as they were located in an unplaced scaffold (NW\_004516558.1 and NW\_004516523.1, respectively).



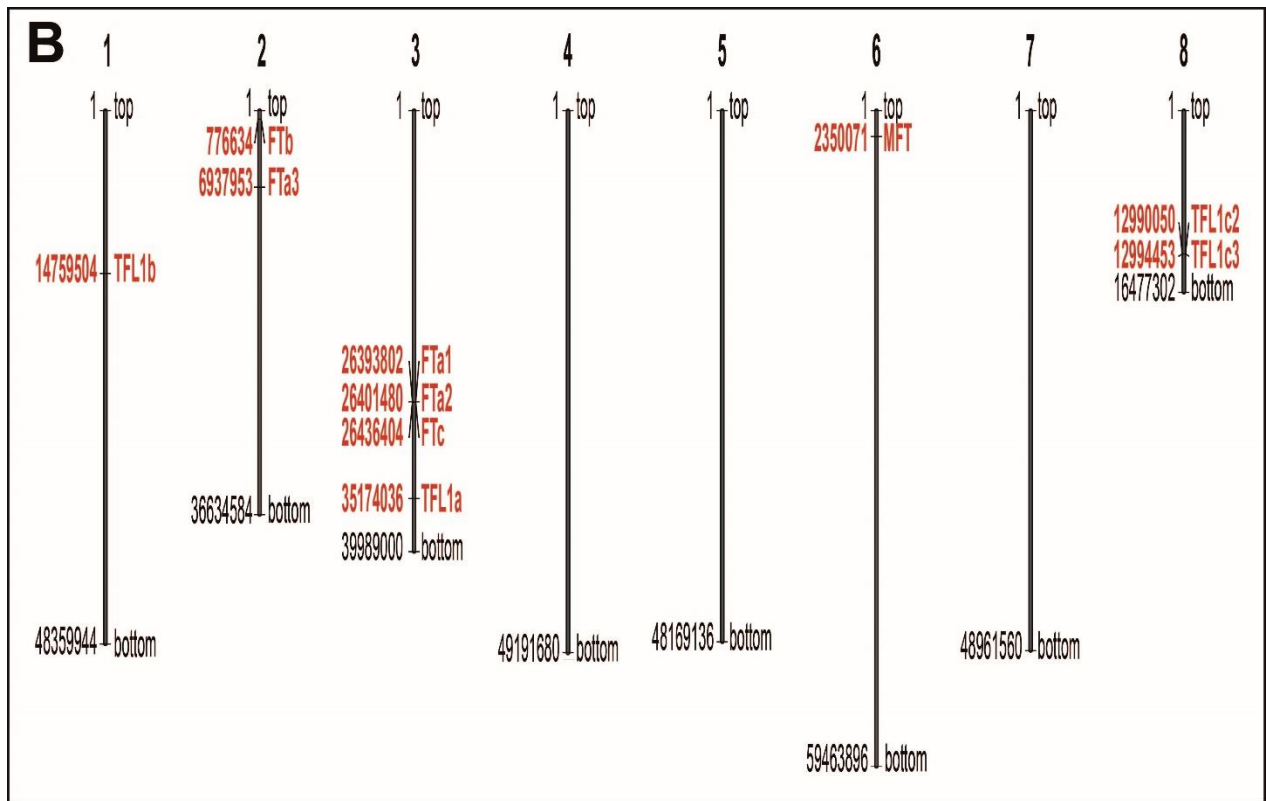

**Supplementary Figure 8 B.**

**Supplementary Figure 9.** Multiple sequence alignment of the PEBP sequences from five species described in Supplementary Table 1. Proteins were aligned in Geneious 8 using MAFFT. Residues conserved in more than 80% of the sites are presented with black background/white letters. Those with a conservation between 60-80% show grey background/white letters and those between 40-60% with grey background/black letters.

|           |   |        | *           |        | 20      |         | *       |          | 40      |        | *        |          | 60   |         | *       |        | 80     |       |      |     |    |    |
|-----------|---|--------|-------------|--------|---------|---------|---------|----------|---------|--------|----------|----------|------|---------|---------|--------|--------|-------|------|-----|----|----|
| AtMFT     | : | -----  | MAA-SV      | -      | DPLVVG  | GVIGDVI | -       | DMFIPT   | ANMSVYE | -      | GPKHVTNC | CDI      | -    | KPSTAV  | NPKVNI  | SG     | :      | 57    |      |     |    |    |
| MtMFT     | : | -----  | MAA-SV      | -      | DPLVVG  | GVIGDVI | -       | DMFIPSV  | AMSVYE  | -      | GPKHVTNC | CDI      | -    | KPSMAIN | PKVNI   | ITG    | :      | 57    |      |     |    |    |
| PsMFT     | : | -----  | MMS-SA      | -      | DPLVVG  | GVIGDVI | -       | DMFIPSV  | AMSVYE  | -      | GPKHVTNC | CDI      | -    | KPSIAIN | QPRIT   | ITG    | :      | 57    |      |     |    |    |
| CaMFT     | : | -----  | MAA-SV      | -      | DPLVVG  | GVIGDVI | -       | DMFIPSV  | AMSVYE  | -      | GPKHVTNC | CDI      | -    | KPSIAIN | PPRV    | ITG    | :      | 58    |      |     |    |    |
| GmMFTa    | : | MRYLSL | STFSLLCITFV | MAA-SV | -       | DPLVVG  | GVIGDVI | -        | DMFIPSV | AMSVYE | -        | GSKHVTNC | CDI  | -       | KPSIAIS | PKPL   | ITG    | :     | 75   |     |    |    |
| GmMFTb    | : | -----  | MAA-SG      | -      | DPLVVG  | GVIGDVI | -       | DMFIPSF  | NMFYE   | -      |          |          |      |         |         |        | :      | 31    |      |     |    |    |
| AtBFT     | : | -----  | MSR-EI      | -      | EPLVVG  | GVIGDVI | -       | EMFNPSV  | IRVY    | -      | FNSNTI   | IVSN     | CH   | -       | APSL    | LLSK   | PRVE   | ITG   | :    | 58  |    |    |
| MtBFT     | : | -----  | MSR-PL      | -      | EPLSVG  | GVIGDVI | -       | EIFNPSV  | RMNVY   | -      | STKOV    | AN       | CH   | -       | MP      | SIVN   | KPRV   | ITG   | :    | 57  |    |    |
| PsBFT     | : | -----  | MSR-QL      | -      | EPLSVG  | GVIGDVI | -       | EIFNPSV  | RMNVY   | -      | STKOV    | AN       | CH   | -       | MP      | SIVN   | KPRV   | ITG   | :    | 57  |    |    |
| CaBFT     | : | -----  | MSR-SL      | -      | EPLSMG  | RVIGDVI | -       | EIFNPSV  | RMNVY   | -      | STKOV    | AN       | CH   | -       | LP      | SIVN   | KPRV   | ITG   | :    | 57  |    |    |
| GmBFTa    | : | -----  | MSR-LMEQ    | PLVVG  | RVIGDVI | -       | EIFNPSV | RMNVY    | -       | STKOV  | AN       | CH       | -    | MP      | STIM    | AKPR   | VE     | ITG   | :    | 58  |    |    |
| GmBFTb    | : | -----  | MSR-LM      | -      | EPLVVG  | GVIGDVI | -       | EIFNPSV  | RMNVY   | -      | STKOV    | AN       | CH   | -       | MP      | STIM   | AKPR   | VE    | ITG  | :   | 57 |    |
| AtTSF     | : | -----  | MSLS-RR     | -      | DPLVVG  | SVIGDVI | -       | DEFTRIV  | SLKVY   | -      | GHR      | VTNC     | LDI  | -       | RP      | SOVL   | NK     | PRVE  | ITG  | :   | 58 |    |
| AtFT      | : | -----  | MSIN-IR     | -      | DPLVVG  | SVIGDVI | -       | DEFNRSI  | TLKVY   | -      | GQR      | VTNC     | LDI  | -       | RP      | SOV    | QNK    | PRVE  | ITG  | :   | 58 |    |
| MtFTa1    | : | -----  | MAGS-SR     | -      | NPLVVG  | RVIGDVI | -       | DEFENSIP | LRVY    | -      | GNR      | DVNN     | CEI  | -       | KP      | SOI    | GN     | QPRV  | ITG  | :   | 58 |    |
| PsFTa1    | : | -----  | MAGS-SR     | -      | NPLVVG  | RVIGDVI | -       | DEFENSIP | LRVY    | -      | GNR      | DVNN     | CEI  | -       | KP      | SHVG   | NQ     | PRV   | ITG  | :   | 58 |    |
| CaFTa1    | : | -----  | MASG-SR     | -      | NPLVVG  | RVIGDVI | -       | DNFENSIP | LRVY    | -      | GNR      | DVNN     | CEI  | -       | KP      | SOV    | AN     | QPRAS | ITG  | :   | 58 |    |
| MtFTa2    | : | -----  | MASG-SR     | -      | NPLVVG  | RVIGDVI | -       | DEFESTIP | LRVY    | -      | GNR      | VTNC     | CEI  | -       | KP      | SOV    | AN     | QPV   | ITG  | :   | 59 |    |
| PsFTa2    | : | -----  | MACS-SR     | -      | NPLVVG  | RVIGDVI | -       | DEFESSIP | LRVY    | -      | GNR      | DVNN     | CEI  | -       | KP      | SOV    | AN     | QOV   | ITG  | :   | 58 |    |
| CaFTa2    | : | -----  | MASG-SR     | -      | NPLVVG  | RVIGDVI | -       | DEFESSIP | LRVY    | -      | GNR      | DVNN     | CEI  | -       | KP      | SOV    | AKQ    | QV    | ITG  | :   | 58 |    |
| GmFTa1/2a | : | -----  | MPGG-SR     | -      | NPLVVG  | RVIGDVI | -       | DEFEISIP | FRVY    | -      | GNR      | DVNN     | CEI  | -       | KP      | SOV    | AN     | QPRV  | ITG  | :   | 58 |    |
| GmFTa1/2b | : | -----  | MPSG-SR     | -      | NPLVVG  | RVIGDVI | -       | DEFESSIP | FRVY    | -      | GNK      | TVGN     | CEI  | -       | KP      | SOV    | NP     | QPRV  | ITG  | :   | 58 |    |
| GmFT-like | : | -----  | EEEDLI      | EDVLI  | DCNNF   | VGLKVY  | -       | GSTQ     | VTNR    | CR     | -        | TSQ      | TNDR | PR      | VE      | IRG    | :      | 50    |      |     |    |    |
| MtFTa3    | : | -----  | MSGS-SR     | -      | DPLVVG  | GVIGDVI | -       | VEFQSSIP | IRVY    | -      | NGK      | ILNN     | CEI  | -       | KP      | SOV    | VN     | QPRV  | ITG  | :   | 58 |    |
| CaFTa3    | : | -----  | MPSGST-SR   | -      | DPLVVG  | GVIGDVI | -       | DEFQSSIP | IRVY    | -      | NGK      | DVNN     | CEI  | -       | KP      | SOV    | VN     | QPRV  | ITG  | :   | 60 |    |
| GmFTa3a   | : | -----  | MPSG-SR     | -      | DPLVVG  | GVIGDVI | -       | DEFEYSIP | IRVY    | -      | NNR      | DVNN     | CEI  | -       | KP      | SOV    | VN     | QPRV  | ITG  | :   | 58 |    |
| GmFTa3b   | : | -----  | MPRG-SR     | -      | DPLVVG  | GVIGDVI | -       | DEFEGSIP | IRVY    | -      | NNK      | DVNN     | CEI  | -       | KP      | SOV    | VN     | QPRIN | ITG  | :   | 58 |    |
| GmFTa3c   | : | -----  | MPRG-SR     | -      | DPLVVG  | GVIGDVI | -       | DEFEGSIP | IRVY    | -      | NNK      | DVNN     | CEI  | -       | KP      | SOV    | VN     | QPRIN | ITG  | :   | 58 |    |
| GmFTa3d   | : | -----  |             |        |         |         |         |          |         |        |          |          |      |         |         |        |        |       |      | :   |    |    |
| MtFTc     | : | -----  | MPQN-LV     | -      | DPLVVG  | IGDVI   | -       | SFFTNSV  | SLSALI  | -      | NNR      | HSNC     | CI   | -       | KP      | SOL    | VNR    | PRV   | ITG  | :   | 55 |    |
| PsFTc     | : | -----  | MPRN-MV     | -      | DEPHV   | SVIGDVI | -       | NFFTNSV  | SLSVI   | -      | NNK      | ILSN     | CL   | -       | KP      | SOL    | VNR    | PRV   | ITG  | :   | 58 |    |
| CaFTc     | : | -----  | MPRNG-GV    | -      | DPLVVG  | GVIGDVI | -       | NFFTNSV  | SLSVI   | -      | NNK      | ILSN     | CV   | -       | KP      | SOV    | VNR    | PRAS  | ITG  | :   | 60 |    |
| GmFTc1    | : | -----  | A-RE        | -      | NPLVVG  | IGDVI   | -       | NFFTISV  | SFTI    | -      | NNR      | HSNC     | LEI  | -       | RP      | SOV    | VNR    | PRV   | ITG  | :   | 55 |    |
| MtFTb1    | : | -----  | M-NPLVVG    | IGDVI  | -       | DEFTNSV | SLRVY   | ENNK     | IVNSG   | ET     | -        | KP       | SQI  | VN      | PPRV    | ITG    | :      | 54    |      |     |    |    |
| PsFTb1    | : | -----  | MRMK-SS     | -      | NPLVVG  | IGDVI   | -       | DEFINSV  | SLRVY   | ENNK   | IVNSG    | ET       | -    | KP      | SQI     | VN     | PPRV   | ITG   | :    | 59  |    |    |
| MtFTb2    | : | -----  | MRMK-SS     | -      | NPLVVG  | IGDVI   | -       | DEFINSV  | SLRVY   | ENNK   | IVNSG    | ET       | -    | KP      | SQI     | VN     | PPRV   | ITG   | :    | 59  |    |    |
| PsFTb2    | : | -----  | MRMK-SS     | -      | NPLVVG  | IGDVI   | -       | DEFINSV  | SLRVY   | ENNK   | IVNSG    | ET       | -    | KP      | SQI     | VN     | PPRV   | ITG   | :    | 59  |    |    |
| CaFTb     | : | -----  | MRSKITM     | -      | NPLVVG  | RVIGDVI | -       | DNFTDSV  | SLRVY   | ENNK   | IVNSG    | ET       | -    | KP      | SQI     | VN     | PPRV   | ITG   | :    | 60  |    |    |
| GmFTb1    | : | -----  | MAI-TT      | -      | NPLVVG  | RVIGDVI | -       | EFASSIP  | LRVY    | NNK    | IVNSG    | ET       | -    | KP      | SQI     | VN     | PPRV   | ITG   | :    | 58  |    |    |
| GmFTb2    | : | -----  | MAI-TT      | -      | NPLVVG  | RVIGDVI | -       | EFASSIP  | LRVY    | NNK    | IVNSG    | ET       | -    | KP      | SQI     | VN     | PPRV   | ITG   | :    | 15  |    |    |
| GmFTb3    | : | -----  | MPR-ST      | -      | DPLVVG  | IGDVI   | -       | EFFTSSV  | SLRVY   | NNC    | IVNSG    | ET       | -    | KP      | SKIL    | NRP    | PR     | ITG   | :    | 58  |    |    |
| GmFTb4    | : | -----  | M-DPLVVG    | IGDVI  | -       | EFFTSCV | SLRVY   | LDSCS    | IVNSG   | ET     | -        | KP       | FCI  | VN      | QPRV    | ITG    | :      | 54    |      |     |    |    |
| GmFTb5    | : | -----  | MPI-SM      | -      | DPLVVG  | IGDVI   | -       | EFFTSSV  | SLRVY   | NNQ    | SSVNSG   | ET       | -    | KP      | SQI     | VN     | KPRIN  | ITG   | :    | 58  |    |    |
| AtCEN     | : | -----  | MARI-SS     | -      | DPLVVG  | RVIGDVI | -       | ENCLQAV  | KMTVY   | NSDK   | OVYNC    | CH       | -    | FP      | SVV     | TKPKV  | VE     | ITG   | :    | 59  |    |    |
| AtTFL1    | : | -----  | MENMGTR-VI  | -      | EPLVVG  | RVIGDVI | -       | DEFPTIT  | KMTVY   | -      | NKKOV    | YN       | CH   | -       | FP      | SSV    | SSK    | PRVE  | ITG  | :   | 61 |    |
| MtTFL1a   | : | -----  | MARM-SQ     | -      | EPLVVG  | RVIGDVI | -       | DSFTTSM  | KMTVY   | -      | NKKOV    | YN       | CH   | -       | FP      | STIN   | TKPKV  | VE    | ITG  | :   | 58 |    |
| PsTFL1a   | : | -----  | MARM-AQ     | -      | EPLVVG  | RVIGDVI | -       | DSFTTSM  | KMTVY   | -      | NKKOV    | YN       | CH   | -       | FP      | STIN   | TKPKV  | VE    | ITG  | :   | 58 |    |
| CaTFL1a   | : | -----  | MARM-SQ     | -      | EPLVVG  | RVIGDVI | -       | DSFTTSM  | KMTVY   | -      | NKKOV    | YN       | CH   | -       | FP      | STIN   | TKPKV  | VE    | ITG  | :   | 58 |    |
| GmTFL1a1  | : | -----  | MARM-PL     | -      | EPLVVG  | RVIGDVI | -       | DSFTTST  | KMTVY   | -      | NKN      | OVYNC    | CH   | -       | FP      | STIN   | TKPKV  | VE    | ITG  | :   | 58 |    |
| GmTFL1a2  | : | -----  | MAKM-PL     | -      | EPLVVG  | RVIGDVI | -       | DSFTTST  | KMTVY   | -      | NKKOV    | YN       | CH   | -       | FP      | STVNT  | TKPKV  | VE    | ITG  | :   | 58 |    |
| MtTFL1b   | : | -----  | MSI-VT      | -      | DPLVVG  | RVIGDVI | -       | DYFTST   | KMTVY   | -      | NTKOV    | YN       | CH   | -       | FP      | SSV    | TTKPKV | VE    | ITG  | :   | 57 |    |
| PsTFL1b   | : | -----  | MSI-TT      | -      | DPLVVG  | RVIGDVI | -       | DYFTTST  | KMTVY   | -      | NTKOV    | YN       | CH   | -       | FP      | SSL    | TTKPKV | VE    | ITG  | :   | 57 |    |
| CaTFL1b   | : | -----  | MMNIV-LA    | -      | DPLVVG  | RVIGDVI | -       | EDFNTT   | VKMSVY  | NNTK   | OVYNC    | CH       | -    | FP      | SSL     | TTKPKV | VE     | ITG   | :    | 61  |    |    |
| GmTFL1b1  | : | -----  |             |        |         |         |         |          |         |        |          |          |      |         |         |        |        |       |      | :   |    |    |
| GmTFL1b2  | : | -----  | MMNI-SS     | -      | DPLVVG  | RVIGDVI | -       | DHFTT    | TKMTVY  | -      | NNKOV    | YN       | CH   | -       | FP      | SSV    | TTKPKV | VE    | ITG  | :   | 58 |    |
| MtTFL1c   | : | -----  | MGSI-TS     | -      | DPLVVG  | RVIGDVI | -       | DYFTT    | TKMTVY  | -      | NNK      | IFNC     | YEP  | -       | FP      | SSV    | TTKPR  | ITG   | :    | 58  |    |    |
| PsTFL1c   | : | -----  | M-NS        | -      | DPLVVG  | RVIGDVI | -       | DYFTASIK | MTVY    | -      | NNK      | IFNC     | YEP  | -       | FP      | SSV    | TTKPR  | ITG   | :    | 56  |    |    |
| CaTFL1c1  | : | -----  | MGSI-SL     | -      | DPLVVG  | RVIGDVI | -       | DNFTPSIK | MTVY    | -      | NNK      | IFNC     | YEP  | -       | FP      | STV    | STR    | PRVE  | ITG  | :   | 58 |    |
| CaTFL1c2  | : | -----  | MGSI-SL     | -      | EPLVVG  | RVIGDVI | -       | DNFTPSIK | MTVY    | -      | NNK      | IFNC     | YEP  | -       | FP      | STV    | STR    | PRVE  | ITG  | :   | 58 |    |
| CaTFL1c3  | : | -----  |             |        |         |         |         |          |         |        |          |          |      |         |         |        |        |       |      | :   | 9  |    |
| GmTFL1c1  | : | -----  | MARM-ST     | -      | DPLVVG  | RVIGDVI | -       | GSFTT    | TKMTVY  | -      | NNKOV    | YN       | CH   | -       | FP      | STI    | TT     | TR    | PRVE | ITG | :  | 58 |
| GmTFL1c2  | : | -----  | MAKM-WT     | -      | DPLVVG  | RVIGDVI | -       | GSFTT    | TKMTVY  | -      | NNKOV    | YN       | CH   | -       | FP      | STI    | TT     | TR    | PRVE | ITG | :  | 57 |

[illegible]

## Supplementary Figure 9. Continued

```

                                *           180           *           200           *
AtMFT      : QNS--PVGLMVQQPSPSRANF--STRMFGHFGLGLPVAVVYFNAQKEPASRRF---- : 173
MtMFT      : QKG--PIGL-VEEPSSRVSE--NTRYFSSQMNGLGLPVAVVYFNSQKEPQAKRR---- : 172
PsMFT      : QKG--PIGL-VEEPSSRVSE--NTRYFSSQMDLGLPVAVVYFNSQREPOSKRR---- : 172
CaMFT      : QKG--PMGL-VEQPSTRVSE--NTRYFSSQDLGLPVAVVYFNSQKEPQAKRR---- : 173
GmMFTa     : QKG--PLGL-VEQPSTRASF--NTRYFSSQDLGLPVAVVYFNSQKEPAVKRR---- : 190
GmMFTb     : QKV--PLGL-VEQPSTRASF--NTRYFSSQDLGLPVAVVYFNSQKEPAAKRR---- : 142

AtBFT      : QRG--RQAV-KAAPETRECF--NTNAFSSSYFGLSPVAVVYFNAQREAPRRRPSY- : 177
MtBFT      : QRG--RQIV--RSPSSRDHF--NTRFSSQENNLGLPVAVVYFNAQRETAARRF---- : 171
PsBFT      : QRG--RQIV--RAPNSRDQF--STRIFSSQENNLGLPVAVVYFNAQRETAARRF---- : 172
CaBFT      : QRG--RQIV--RSPSTRDHF--NTRSFSSQNSLGLPVAVVYFNAQRETAARRF---- : 172
GmBFTa     : QRG--RQIV--RSPSSRDHF--NTRFSSQENNLGLPVAVVYFNAQRETAARRF---- : 173
GmBFTb     : QRG--RQIV--RSPSSRDHF--NTRFSSQENNLGLPVAVVYFNAQRETAARRF---- : 172

AtTSF      : QLG--RQIV--YAPGWRQCF--NTREFAEIYNLGLPVAVVYFNCQRENGCGGRT-- : 175
AtFT      : QLG--RQIV--YAPGWRQCF--NTREFAEIYNLGLPVAVVYFNCQRESGCGGRRL-- : 175
MtFTa1     : QQC--RQIV--YAPGWRQCF--NTREFAELYNLGLPVAVVFFNCQRESGSGGRTFR- : 176
PsFTa1     : QQC--RQIV--YAPGWRQCF--NTREFAELYNLGLPVAVVFFNCQRESGSGGRTFR- : 176
CaFTa1     : QQC--RQIV--YAPGWRQCF--NTREFAELYNLGLPVAVVFFNCQRESGSGGRTFR- : 176
MtFTa2     : QQC--RQIV--YAPGWRQCF--NTREFAELYNLGLPVAVVFFNCQRETAGSGGRTFR- : 177
PsFTa2     : QQC--RQIV--YAPGWRQCF--NTREFAELYNLGLPVAVVFFNCQRETAGSGGRTFR- : 176
CaFTa2     : QQC--RQIV--YAPGWRQCF--NTREFAELYNLGLPVAVVFFNCQRETAGSGGRTFR- : 176
GmFTa1/2a  : QQC--RQIV--YAPGWRQCF--NTREFAELYNLGLPVAVVFFNCQRESGSGGRTF-- : 175
GmFTa1/2b  : QQC--RQIV--YAPGWRQCF--NTREFAELYNLGLPVAVVFFNCQRETAGSGGRTF-- : 175
GmFT-like  : MKS--GRIV--KAEKRTNF--MTTEFAKYELQIVAGVFFNSRRRG----- : 163
MtFTa3     : QLG--REIV--YAPGWRQCF--NTREFAELYNLGLPVAVVYFNIQREHSGGGRRL-- : 175
CaFTa3     : QLG--REIV--YAPGWRQCF--NTREFAELYNLGLPVAVVYFNIQREAGSGGGRRL- : 178
GmFTa3a    : QLG--REIV--YAPGWRQCF--NTKEFAELYNLGLPVAVVYFNIQRESGSGGRRLY- : 176
GmFTa3b    : QQC--REIV--YAPGWRQCF--ITREFAELYNLGLPVAVVYFNIQRESGCGGRRLC- : 176
GmFTa3c    : QQC--REIV--YAPGWRQCF--ITREFAELYNLGLPVAVVYFNIQRESGCGGRRL-- : 175
GmFTa3d    : QLG--REIV--YAPGWRQCF--NTREFAELYNLGLPVAVVYFNIQRESGSGGRRLYH : 64
MtFTc      : QLG--RQIV--FAEDWRHNF--NTNFABEINNLF--IVASVYFNCQRERGCGGRRC-- : 171
PsFTc      : QLG--RQIV--FAEWRHNF--NTRNFAEINNLF--IVGSVYFNCQRERGCGGRRC-- : 174
CaFTc      : QLG--RQIV--FAEWRHNF--KTRNFAEINNLF--IVASVYFNCQRERGCGGRRS-- : 176
GmFTc1     : QLG--RQIV--ITBEWRHNF--NSRNFAEINNLF--PVAVVYFNCQRERGCGGRRY-- : 171
MtFTb1     : QPC--RHIV--LAPGWRQCF--ITRDFAEFYNLGLPVAVVYFNCQRENGSGGGRLLI : 173
PsFTb1     : QPC--RHIV--LPPGWRQCF--ITRDFAEFYNLGLPVAVVYFNCQRENGSGGGRMII : 178
MtFTb2     : QPC--RHIV--LAPGWRQCF--ITRDFAEFYNLGLPVAVVYFNCQRENGSGGGRMVI : 178
PsFTb2     : QPC--RHIV--LPPGWRQCF--ITRDFAEVYNLGLPVAVVYFNCQRENGSGGGRMIT : 178
CaFTb      : QPC--RHIV--LAPGWRQCF--VTRDFAEVYNLGLPVAVVYFNVQRETAGSGGRMII : 179
GmFTb1     : QPR--RMSI--PAPGWRQCF--ITRDFAEVYNLGLPVAVVYFNCQROGGSGGGRML : 177
GmFTb2     : ----ENVF--TSSGWRQNYIMTRDFA--YNLGLPVAVVYFNCQROGGSGGGRML : 86
GmFTb3     : QLR--RLIL--QPPGWRQCF--NTRDFAEIYNLGLPVAVVYFNCCKRENDQSSGRRR : 176
GmFTb4     : QSG--RQII--YAPGWRQCF--NTRDFSQVYNLGLPVAVVYFNCCKRQNNNSARDGRR : 173
GmFTb5     : QFD--RQIV--HAPWRQCF--NTRDFAEVYNLGLPVAVVYFNCQREGGWGGRR-- : 175

AtCEN      : QTR--RGSV-VSVESYRDQF--NTRFSAENLGLPVAVVFFNCQRETAARRF---- : 175
AtTFL1     : QKQ--RRVI--FPNIPSRDHF--NTRKFAVEYDLGLPVAVVYFNAQRETAARKF---- : 177
MtTFL1a    : QKN--RESV--TASPSRDYF--NTRNFAEQNDLGLPVAVVYFNAQRETAARRF---- : 174
PsTFL1a    : QRA--RDSV--RATESSRDHF--NTRSFSSQNDLGLPVAVVYFNAQRETAARRF---- : 174
CaTFL1a    : QKS--RESV--MTTSSRDHF--NTRNFAEQNDLGLPVAVVYFNAQRETAARRF---- : 174
GmTFL1a1   : QKR--RQCV--TPPTSRDHF--NTRKFAEENLGLPVAVVYFNAQRETAARRF---- : 173
GmTFL1a2   : QKR--RQCV--TPPTSRDHF--NTRKFAEENLGLPVAVVYFNAQRETAARRF---- : 173
MtTFL1b    : QKR--RQIV--MKIPTSRDLF--NTKKFAQDNLGLPVAVVYFNAQRETAARRF---- : 173
PsTFL1b    : QKR--RQIV--MKIPTSRDLF--NTKKFAQDNLGLPVAVVYFNAQRETAARRF---- : 173
CaTFL1b    : QKR--RQIV--MKIPTSRDLF--NTKKFAEENLGLPVAVVYFNAQRETAARRF---- : 177
GmTFL1b1   : QKR--RQGV--LKTPTTRDLF--NSRSFAEENLGLPVAVVYFNAQRETAARRF---- : 156
GmTFL1b2   : QKR--RGSV--ENSNKK----- : 140
MtTFL1c    : QEKGKKHSI--VAFPSRDHF--NTRAFSAQNDLGLPVAVVYFNARFAAPRRFAS-- : 177
PsTFL1c    : CKRGNKYSI--TCEPSRDHF--NTRNFAEQNDLGLPVAVVYFNARFAAPRRF---- : 173
CaTFL1c1   : QKK--KHSI--TTPSSRDHF--NTRSFSSQNDLGLPVAVVYFNARFPAGRKPTYI- : 176
CaTFL1c2   : QKK--KHSI--TTPSSRDHF--NTRSFSSQNDLGLPVAVVYFNARFPAGRKPTYI- : 176
CaTFL1c3   : QKK--KHSI--TTPSSRDHF--NTRSFSSQNDLGLPVAVVYFNARFPAGRKPTYI- : 127
GmTFL1c1   : QKR--RQCV--TRPSSRDHF--NTRKFAEENLGLPVAVVYFNAQRETAARRF---- : 174
GmTFL1c2   : QKR--RQCV--TRPSSRDHF--NTRKFAEENLGLPVAVVYFNAQRETAARRF---- : 173

```

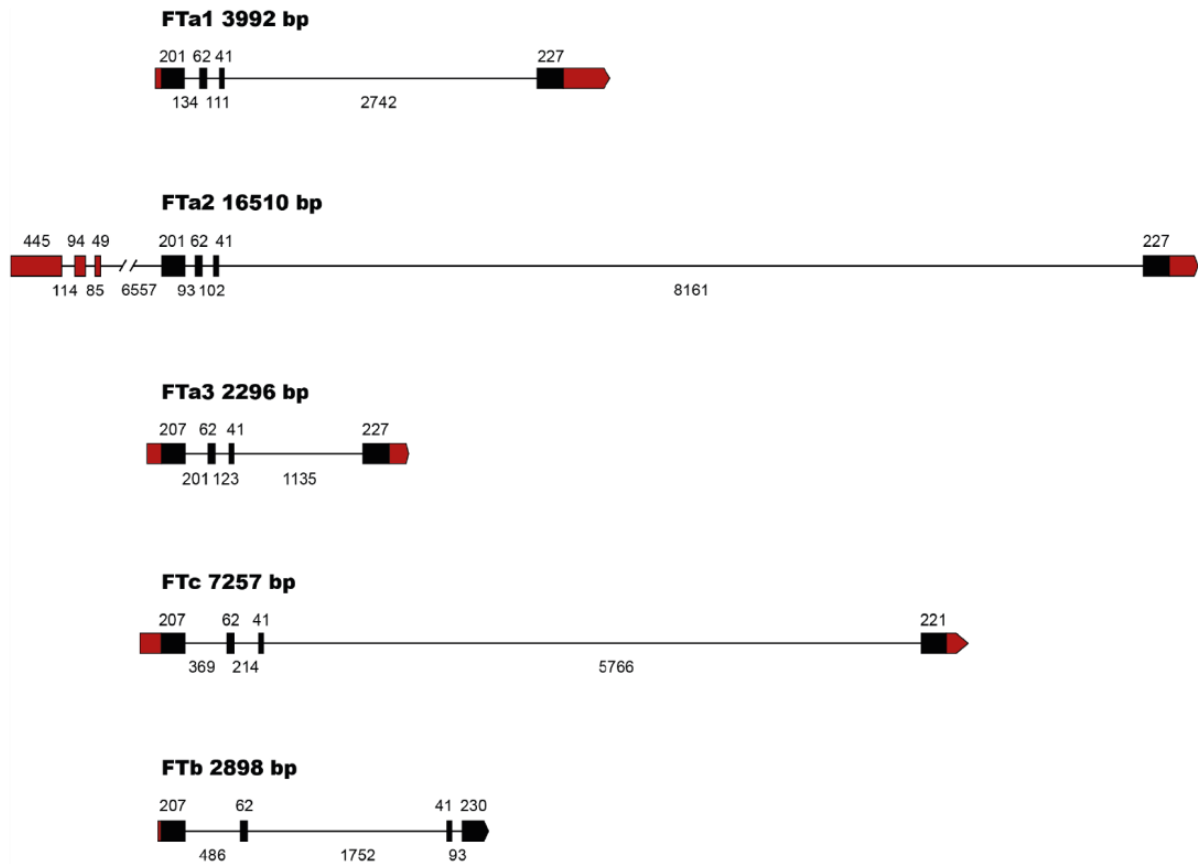

**Supplementary Figure 10.** Graphic representation of the genomic sequences of the five chickpea *FT* genes. Black boxes indicate exons (sizes over the line, in bp), red boxes the 5' and 3' untranslated regions and lines correspond to introns (sizes under the line).

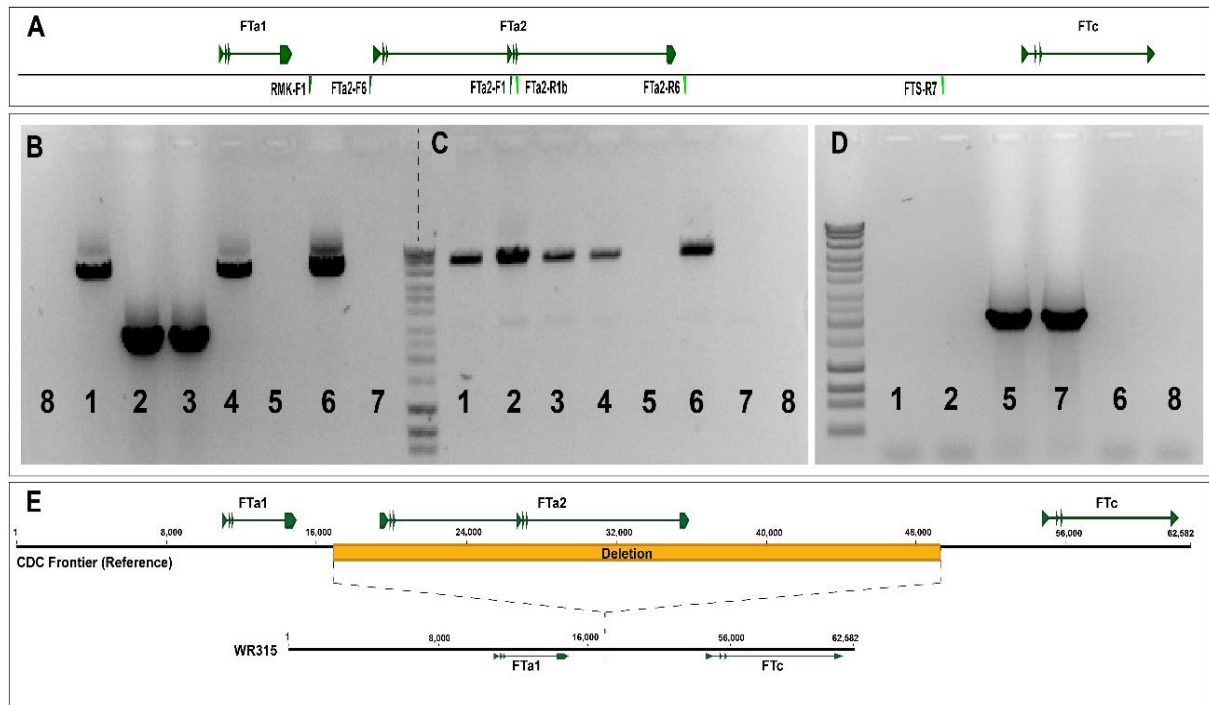

**Supplementary Figure 11.** (A) Schematic diagram of the region of chromosome 3 containing the *Fta1*-*Fta2*-*Ftc* cluster. The black line represents genomic DNA sequence with *Fta1*, *Fta2* and *Ftc* gene models shown at top in green (triangles representing exons and line corresponding to introns). The position of the primers used are indicated below; forward and reverse primers are presented in dark and light green, respectively. The failure to amplify any region of *Fta2* in some lines, shown by the electrophoresis gel of the products obtained with primers Fta2-F6/Fta2-R1b (B) and Fta2-F1/Fta2-R6 (C), suggested a deletion of the gene. 7 chickpea accessions were tested, as follows: 1-ICC4958; 2-PI489777; 3-Cr5-9; 4-CA2156; 5-WR315; 6-ILC3279; 7- ICCV2; 8-SDW. To determine the extent of the deletion, several primers were tested in the *Fta1*-*Fta2* and *Fta2*-*Ftc* intergenic regions. The primer pair RMK-F1/FTS-R7 successfully yielded a band (D). Since the expected size of the amplicon in (D) is 33.7 kb according to CDC Frontier genome used as reference, the presence of a 2-3 kb band indicated a probable deletion spanning ~ 30kb. Sequencing of the band confirmed the deletion of 32kb that completely eliminates *Fta2* and includes part of the *Fta1*-*Fta2* and *Fta2*-*Ftc* intergenic regions (E). All PCRs were performed in a final volume of 25  $\mu$ L containing 50 ng template DNA, 5  $\mu$ L of 5x reaction buffer, 10 mM dNTPs, 0.2  $\mu$ M of each primer, 50 mM MgCl<sub>2</sub>, 0.1  $\mu$ L of MangoTaq™ DNA polymerase (Bioline, Australia) and autoclaved Milli-Q water to final volume. Reactions were performed in a thermal cycler using the following program: an initial denaturation of 5 min at 94°C, followed by 35-40 cycles (94°C for 40 seconds, 58°C annealing temperature and 10 min extension) and a final extension of 10 minutes at 72°C. Primers sequences: Fta2-F6 AAGCCCACAACCCACCTAAGGG; Fta2-R1b ACTAGCCCCAGCAGTTGAAG; Fta2-F1 TAGGCGGAAACGATCTCAGG; Fta2-R6 GCCATAAACCTCTGTGCAACGGC, RMK-F1 ACTGTTCTGCACACAGTGGCTACC; FTS-R7 AGGCCAAAGACAAGATCCCG.



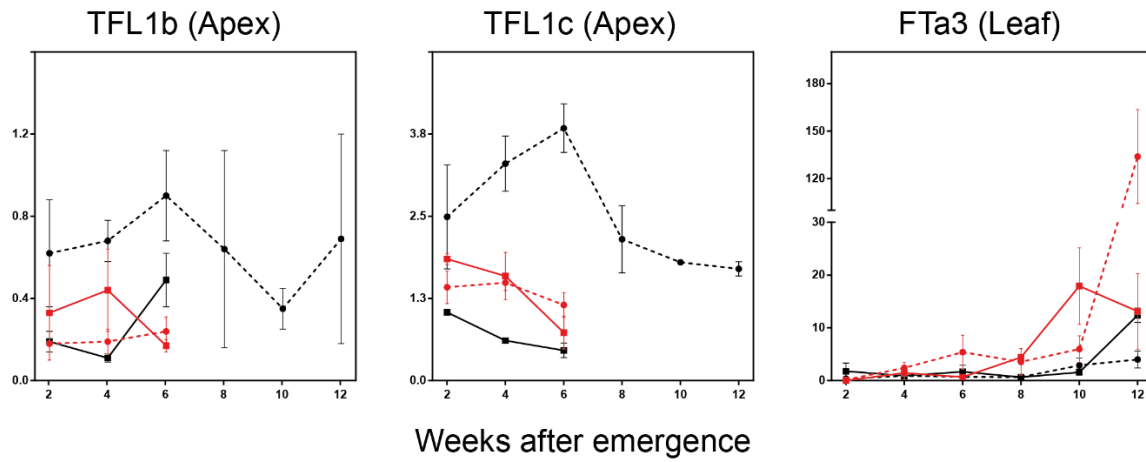

**Supplementary Figure 12.** Relative expression of flowering-related chickpea genes in CRIL2 parental lines. ICC4958 and PI48977 are represented by red and black lines, respectively. Continuous lines/squares indicate long day condition while dashed lines/circles represent short day. TFL1b and TFL1c expression was measured only in apex and FTa3 expression was measured in both tissues but found only in leaf. The average  $\pm$  SE of 2 biological and 2 technical replicates is shown, and transcripts were normalized against ACTIN.

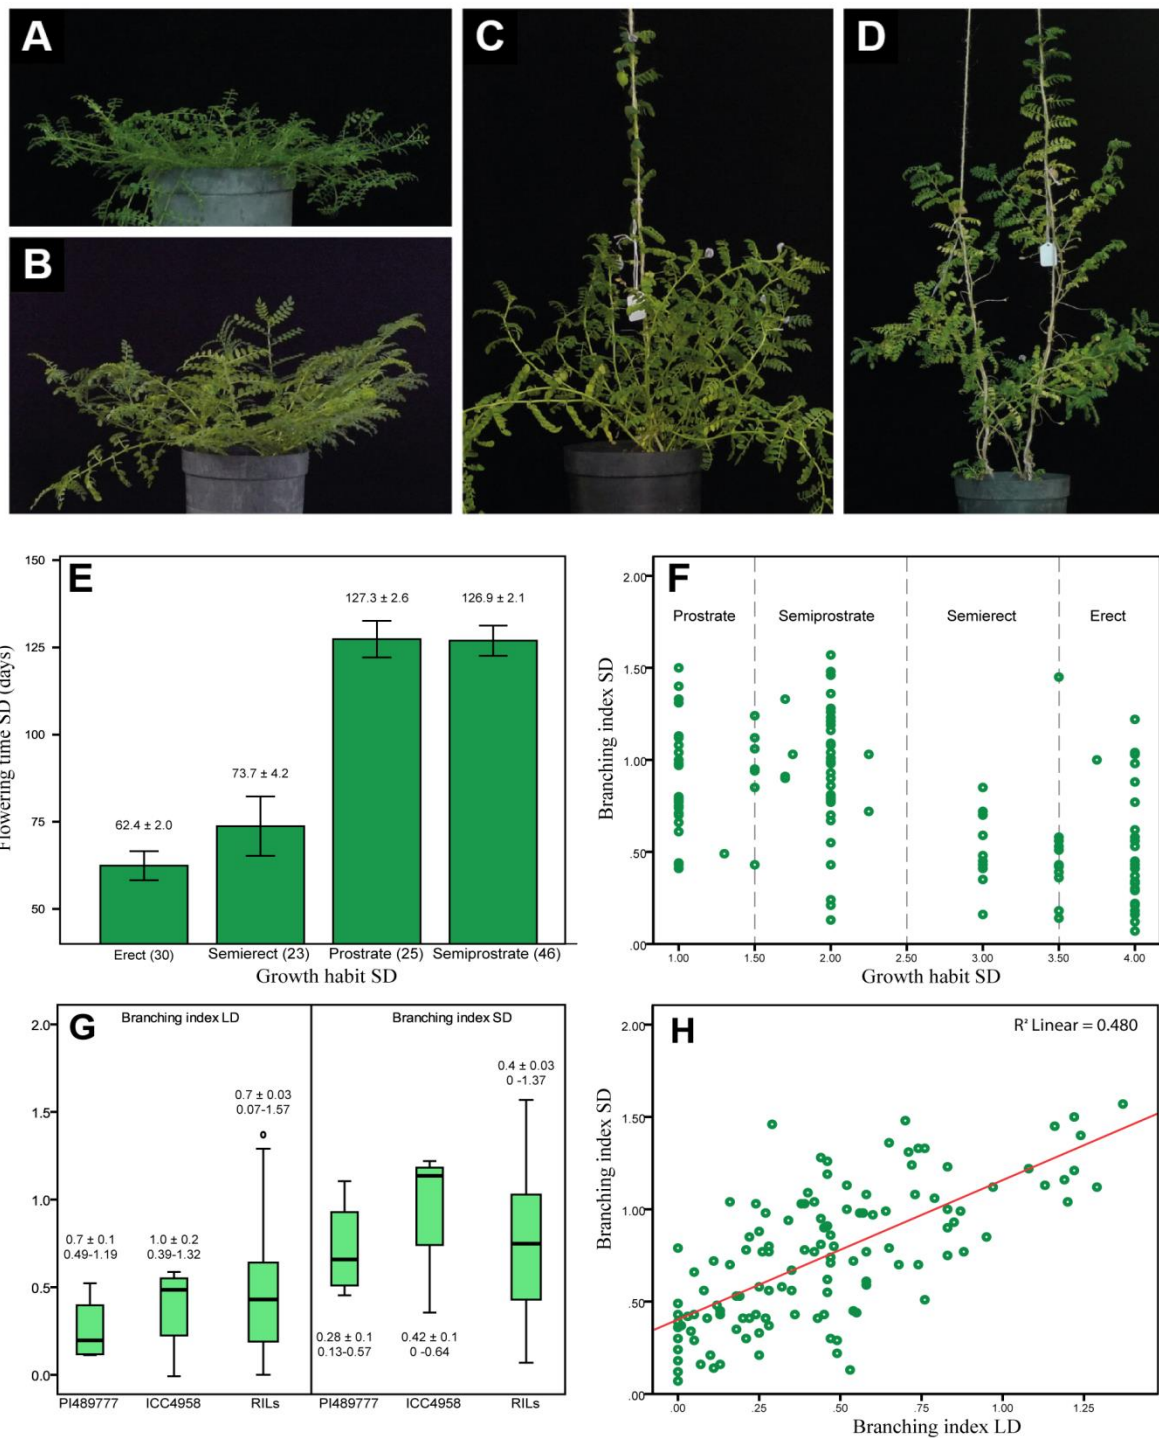

**Supplementary Figure 13.** Variation in growth habit (GH) observed in the CRIL2 population, illustrated by representative examples of the four categories used in the present study: Prostrate (**A**), semi-prostrate (**B**), semi-erect (**C**) and erect (**D**). (**E**) Relationship between GH and flowering phenotype (DTF) of the CRIL2 population grown under SD. Numbers over bars indicate mean DTF ± standard error and those between parentheses correspond to the number of RILs in each category. (**F**) Relationship between GH and branching index (BI) of the CRIL2 population grown under SD. Boxplot illustrating the variation in branching index displayed by CRIL2 parental lines and RILs under LD and SD (**G**). Box edges denote the lower and upper quantiles with median value in the middle of the box. (**H**) Relationship between BI of CRIL2 population grown under SD and LD photoperiod.

**Supplementary Table 1.** Details of the HRM markers developed in this study for each population, and identity (NCBI GeneID) of the genes targeted by them.

| Marker                       | Population  | Fw Sequence               | Rv Sequence               | GeneID    |
|------------------------------|-------------|---------------------------|---------------------------|-----------|
| <b>LHY</b>                   | CRIL2/RIP12 | AAACCAACTAAGCATACCCT      | TGAGCATCACTCATTCACCA      | 101500635 |
|                              | RIPs8/5     | CGTCACACTTGTAATCTTCATTCC  | AGTTTTCCTCCCTTTAATAATGTGG |           |
| <b>CP450</b>                 | CRIL2/RIP12 | CACAAAATAGAGAACAAATGACAGC | ACTTTTCCCTTTGCATGTAGG     | 101502624 |
|                              | RIPs8/5     | AGAGTTGTATAGTTGTAAAGGATG  | GTGTGTGTGTTTATCAATTAAAGC  |           |
| <b>CDF2d</b>                 | CRIL2/RIP12 | TGGTTCCAATTAAGTTTCAAGTG   | AGTCAAGTGTTTGGTAAGAGTTG   | 101500722 |
|                              | RIPs8/5     | AGTCGATGCTTAATCTTCAACAGC  | AGATCTGCATAAAGATGGTTCC    |           |
| <b>WUS11</b>                 | CRIL2/RIP12 | CAGCCTGGTAATTAACATGCATC   | ATGATTTTGAGCAATTATTCTGTG  | 101503157 |
|                              | RIPs8/5     | GCATAACCTAGAGTGATCGAGC    | CTACTCTGACTTAATGGGTTCG    |           |
| <b>FTa1</b>                  | CRIL2/RIP12 | AATCATCCCCAAGAGATCAA      | TGCACAGTCATTGTGTTTCG      | 101497376 |
|                              | RIPs8/5     | ACTGTTCTGCACACAGTGGCTACC  | AAAGAGATCTAACACATTTTGC    |           |
|                              |             |                           | GAGGAACACGACGCCTCC        |           |
| <b>ING2</b>                  | CRIL2/RIP12 | CATCTCATGGCTCTAAGAAAGG    | ATTTCCTTAAGCAATTTCTCAATGG | 101503708 |
| <b>SUVH4<sup>1</sup></b>     | CRIL2/RIP12 | TTCGCCGTCACTACCTCG        | GGAGATTAAGCTTCGGAGG       | 101508428 |
| <b>COLh</b>                  | CRIL2/RIP12 | TGCTACATCATTACCTAGTAACA   | TGCCATGATATAGGAAGTCTTAGTT | 101504031 |
| <b>SOC1a</b>                 | CRIL2/RIP12 | AAACAAAGAAAAACGAATGTGTCC  | CGACATATAATTTCATTGTGGACCG | 101510775 |
| <b>SCARECROW<sup>2</sup></b> | CRIL2/RIP12 | GAGACATGTTGTTGAACAGC      | CTTGATGGTCCTCTAACAGC      | 101513767 |
| <b>RAPTOR1<sup>2</sup></b>   | CRIL2/RIP12 | CCCAATGCCATCCAAATCGG      | CACACAACAACAATACCTAGGG    | 101514864 |
| <b>ARF9<sup>2</sup></b>      | RIP12       | GCAATATGGTGAGAAGAATTTTC   | TGAGATAGGCAATTTAGTCCCTG   | 101491204 |
| <b>ABI5</b>                  | CRIL2/RIP12 | TTAGCACAAGAACGAGCGAGC     | GTGAACGAAAAGGTGTATGAAGG   | 101490892 |
| <b>GATA9<sup>1</sup></b>     | CRIL2/RIP12 | GAGGAATATGTCTTCTCCATTCC   | TGGAAAGAGTAATTTTCCCCCTA   | 101503040 |
| <b>NAC100<sup>1</sup></b>    | CRIL2/RIP12 | CAGGTCTTAGCAATGACACG      | GCCCTATTTCTTCCCATGTC      | 101500623 |
| <b>GIGANTEA</b>              | CRIL2/RIP12 | TGTTGAGTACTTGATTCAAGTTAC  | TCAGTATATAGATGCATACCTCAGC | 101511540 |
| <b>ELF6</b>                  | CRIL2/RIP12 | ACCACCCATTTCAAGTTTGTTC    | CCAGGGTCAAAATTATCATAGTCG  | 101509509 |
| <b>TEMb</b>                  | CRIL2/RIP12 | GAGTTGAGAAAATCTGTTTCAGCG  | AGGTTCGCGGAAAAGACG        | 101492303 |
| <b>PHYA1</b>                 | CRIL2/RIP12 | ACAATTGCCTTGTAATCGCC      | GCCCAAGATATAACTGCTCAG     | 101506511 |
| <b>CDF3b</b>                 | RIPs8/5     | AACAACCGAAGAAAAATAGG      | GAATTTGTATAATGTTTATCTTCG  | 101499964 |
| <b>COLg</b>                  | RIPs8/5     | AGAGACTCTGAAGGTGTCCC      | CAGTGGCTCGGAGAAAGTGG      | 101499146 |
| <b>AP2-like</b>              | RIPs8/5     | AACAAACATCGTCACATCACC     | CCTTGTGCTATTTAGTGTTCTGC   | 101502947 |
| <b>LOB189</b>                | RIPs8/5     | ACAAAATCAATACAAGCAAACC    | TGCAACCGTTAGTTTGTGTTGG    | 101508422 |
| <b>PRSP</b>                  | RIPs8/5     | GATACATTTTCGCTCAAACATATG  | TGCGTTGAAAAGTGTTTATTAGC   | 101491522 |
| <b>PRT6</b>                  | RIPs8/5     | AAATTTTCATTCTCCTAAGACAGT  | ACGGTCCAACCCAACGTATA      | 101506928 |
| <b>WRKY</b>                  | RIPs8/5     | TTCTGAGAGCACCGTGATGG      | AGCATCTCCAAGTGAATTAATG    | 101511519 |

(1) Primers designed by Saxena et al (2014)

(2) Primers designed for this study based on SNPs described by Saxena et al (2014)

**Supplementary Table 2.** Sequence and product size of the primers used to measure the expression of flowering related genes in chickpea

| Gene         | Fw primer              | Rv primer                | Product size (bp)   |      | GeneID    |
|--------------|------------------------|--------------------------|---------------------|------|-----------|
|              |                        |                          | Genomic             | cDNA |           |
| <i>ACTIN</i> | ATTGTCTTGAGTGGTGGTTCT  | TTCCTCTCTGGTGGTGCTAC     | (Verma et al. 2013) |      |           |
| <i>PIM</i>   | GAACTTCAGAGTCTGGAACAGC | CATTGTGCCTGTTGTTGAGC     | 472                 | 188  | 101488241 |
| <i>UNI</i>   | TGCAACGCGTAACAGTGAACG  | ACGAACAATGCCGTGAGTTCTTG  | 660                 | 169  | 101503680 |
| <i>FTa1</i>  | TTGCCAATCAACCCAGAGCG   | AGTGGGGTTACTTGGGCTAGG    | 236                 | 101  | 101497376 |
| <i>FTa2</i>  | GTTCTGACGGTGGTTCTCTC   | CGGAGGTTCAAAAAGAAGG      | 297                 | 183  | 101496618 |
| <i>FTc</i>   | TGTTGGTGGTGAAGATCTAAGG | ATTCCTGCTGAAGGATTCG      | 6616                | 186  | 101508200 |
| <i>FTb</i>   | GGTGAGCTCAAACCCTCCCA   | TCCCTCATATTTGGGTCAGTAGG  | 618                 | 131  | 101505276 |
| <i>FTa3</i>  | CCATCCCGGAGCATACACAGTC | TGCACCAAGCCCTAGCAATCC    | 1460                | 196  | 101515383 |
| <i>E1</i>    | AACGACAACAACAAGGGATCGG | TGCAGCCAACAAGAGTCTGC     | 120                 | 120  | 101497661 |
| <i>TFL1b</i> | TATACCGGGCACAAACAGATG  | GGAGGTCCAAGGTCATTGTC     | 584                 | 195  | 101508699 |
| <i>TFL1c</i> | ACGTTCCCTGGCCCAAGTGAT  | TGGATCCCTATGTTAGGCTTTGGT | 1134                | 136  | 101491943 |

**Supplementary Table 3.** Description, physical position in the chromosome and GeneID of the 59 genes annotated between markers SUVH4 and GATA9, according to the genome assembly of cultivar CDC Frontier (ASM33114 v1; Varshney et al., 2013), available at the National Center for Biotechnology Information (NCBI; <https://www.ncbi.nlm.nih.gov>).

| Marker | Position | GeneID    | Description                                                       |
|--------|----------|-----------|-------------------------------------------------------------------|
| SUVH4  | 25748486 | 101508428 | histone-lysine N-methyltransferase, H3 lysine-9 specific SUVH4    |
|        | 25765688 | 101509380 | CLAVATA3/ESR (CLE)-related protein 4A-2-like                      |
|        | 25787922 | 101509702 | uncharacterized protein LOC101509702                              |
|        | 25849917 | 101510346 | protein Mpv17-like, partial                                       |
|        | 25899924 | 101510883 | N-alpha-acetyltransferase MAK3                                    |
|        | 25908342 | 101511521 | cytochrome b-c1 complex subunit Rieske-4, mitochondrial-like      |
|        | 25911181 | 101511199 | uncharacterized protein LOC101511199                              |
|        | 25920520 | 101511847 | uncharacterized protein LOC101511847                              |
|        | 25929005 | 101512385 | uncharacterized protein LOC101512385                              |
|        | 25945170 | 101512699 | LRR receptor-like serine/threonine-protein kinase RPK2            |
|        | 25987693 | 101513246 | UPF0496 protein At3g19330-like                                    |
|        | 26006715 | 101513575 | putative serine/threonine-protein kinase isoform X2               |
|        | 26029555 | 101514543 | chalcone synthase                                                 |
|        | 26038727 | 101505971 | uncharacterized protein LOC101505971                              |
|        | 26049105 | 101514869 | jasmonate O-methyltransferase-like isoform X2                     |
|        | 26056836 | 101506278 | jasmonate O-methyltransferase-like                                |
|        | 26073603 | 101506600 | 3,7-dimethylxanthine N-methyltransferase-like                     |
|        | 26105741 | 101515408 | 7-methylxanthosine synthase 1-like                                |
|        | 26119620 | 101506937 | ethylene-responsive transcription factor LEP                      |
|        | 26135351 | 101515744 | nudix hydrolase 12, mitochondrial                                 |
|        | 26162323 | 101488713 | calcium-binding mitochondrial carrier protein SCaMC-1-like        |
|        | 26169052 | 101489051 | uncharacterized protein LOC101489051                              |
|        | 26187333 | 101489383 | histidine biosynthesis bifunctional protein hisIE, chloroplastic  |
|        | 26191225 | 101489915 | uncharacterized protein LOC101489915                              |
|        | 26198363 | 105851804 | glycine-rich cell wall structural protein 1-like                  |
|        | 26211557 | 101490249 | syntaxin-22-like                                                  |
|        | 26221867 | 101490568 | syntaxin-22-like                                                  |
|        | 26223872 | 101490780 | uncharacterized protein LOC101490780                              |
|        | 26228217 | 101491110 | DNA cross-link repair protein SNM1 isoform X1                     |
|        | 26233285 | 101491643 | uncharacterized protein LOC101491643                              |
|        | 26237155 | 101491949 | uncharacterized protein LOC101491949                              |
|        | 26259086 | 101492622 | uncharacterized protein LOC101492622                              |
|        | 26268535 | 101492953 | probable xyloglucan endotransglucosylase/hydrolase protein B      |
|        | 26275124 | 101493288 | probable xyloglucan endotransglucosylase/hydrolase-like precursor |
|        | 26293522 | 101493610 | glyceraldehyde-3-phosphate dehydrogenase A, chloroplastic         |

**Supplementary Table 3. Continued**

|        |          |           |                                                                           |
|--------|----------|-----------|---------------------------------------------------------------------------|
|        | 26300947 | 101493929 | pentatricopeptide repeat-containing protein At3g26630, chloroplastic      |
|        | 26304938 | 101494250 | WD repeat-containing protein LWD1                                         |
|        | 26309206 | 105851806 | pentatricopeptide repeat-containing protein At3g26630, chloroplastic-like |
|        | 26315891 | 101494555 | acetyl-coenzyme A synthetase, chloroplastic/glyoxysomal                   |
|        | 26325185 | 101494873 | eukaryotic peptide chain release factor subunit 1-3                       |
|        | 26331419 | 101495197 | importin-13 isoform X2                                                    |
|        | 26353855 | 101495954 | INO80 complex subunit D-like                                              |
|        | 26365580 | 101496291 | omega-hydroxypalmitate O-feruloyl transferase                             |
| FTa1   | 26393854 | 101497376 | protein FLOWERING LOCUS T-like                                            |
|        | 26409508 | 101496618 | protein HEADING DATE 3A-like isoform X1                                   |
|        | 26437711 | 101508200 | protein FLOWERING LOCUS T-like                                            |
|        | 26446273 | 101497706 | transmembrane and coiled-coil domain-containing protein 1-like            |
|        | 26454060 | 101498244 | aquaporin SIP1-2-like                                                     |
|        | 26459034 | 101498578 | apyrase 2-like                                                            |
|        | 26465157 | 101499141 | pentatricopeptide repeat-containing protein At5g15010, mitochondrial      |
|        | 26476855 | 101499461 | nucleoside-triphosphatase-like                                            |
|        | 26505866 | 101499961 | NAC transcription factor 29                                               |
|        | 26513981 | 101500308 | uncharacterized protein LOC101500308                                      |
| NAC100 | 26542626 | 101500623 | NAC domain-containing protein 100-like                                    |
|        | 26551883 | 101500931 | U11/U12 small nuclear ribonucleoprotein 65 kDa protein                    |
|        | 26560819 | 101501672 | thioredoxin-like 1-1, chloroplastic                                       |
|        | 26568175 | 101501985 | CCR4-NOT transcription complex subunit 3 isoform X1                       |
|        | 26586013 | 101503370 | glucan endo-1,3-beta-glucosidase 8-like                                   |
| GATA9  | 26593826 | 101503040 | GATA transcription factor 9-like                                          |



**Supplementary Table 4.** Accession number of the PEBP genes from five plant species; *Arabidopsis thaliana*, *Medicago truncatula*, *Pisum sativum* (Pea), *Glycine max* (soybean) and *Cicer arietinum* (chickpea). Soybean accessions were obtained from Wang et al. (2015) and the protein sequences retrieved from the Soybean Knowledge Database [<http://soykb.org>; Joshi et al. (2012)]. Proteins sequences retrieved from the accessions listed were used in the alignment displayed in Supplementary Figure 10.

| Arabidopsis |           | Medicago     |                | Pea         | Chickpea      |              | Soybean          |               |
|-------------|-----------|--------------|----------------|-------------|---------------|--------------|------------------|---------------|
| <b>MFT</b>  | AT1G18100 |              | Medtr8g106840  | PsCam040701 |               | LOC101504081 | <b>GmMFTa</b>    | Glyma05g34030 |
|             |           |              |                |             |               |              | <b>GmMFTb</b>    | Glyma08g05650 |
| <b>BFT</b>  | AT5G62040 |              | Medtr0020s0120 | PsCam044479 |               | LOC101507903 | <b>GmBFTa</b>    | Glyma09g26550 |
|             |           |              |                |             |               |              | <b>GmBFTb</b>    | Glyma16g32080 |
| <b>ATC</b>  | AT2G27550 |              | -              | -           |               | -            |                  | -             |
| <b>TFL1</b> | AT5G03840 | <b>TFL1a</b> | Medtr7g104460  | AY340579    | <b>TFL1a</b>  | LOC101506075 | <b>GmTFL1b1</b>  | Glyma12g30940 |
|             |           | <b>TFL1b</b> | Medtr2g086270  | AY340580    | <b>TFL1b</b>  | LOC101508699 | <b>GmTFL1b2</b>  | Glyma13g39360 |
|             |           | <b>TFL1c</b> | Medtr1g060190  | AY343326    | <b>TFL1c1</b> | LOC101495644 | <b>GmTFL1a1</b>  | Glyma03g35250 |
|             |           |              |                |             | <b>TFL1c2</b> | LOC101491943 | <b>GmTFL1a2</b>  | Glyma19g37890 |
|             |           |              |                |             | <b>TFL1c3</b> | LOC101492277 | <b>GmTFL1c1</b>  | Glyma10g08340 |
|             |           |              |                |             |               |              | <b>GmTFL1c2</b>  | Glyma13g22030 |
| <b>FT</b>   | AT1G65480 | <b>FTa1</b>  | Medtr7g084970  | HQ538822    | <b>FTa1</b>   | LOC101497376 | <b>GmFTc1</b>    | Glyma19g28400 |
| <b>TSF</b>  | AT4G20370 | <b>FTa2</b>  | Medtr7g085020  | HQ538821    | <b>FTa2</b>   | LOC101496618 | <b>GmFTa3a</b>   | Glyma16g26660 |
|             |           | <b>FTa3</b>  | Medtr6g033040  | -           | <b>FTa3</b>   | LOC101515383 | <b>GmFTa3b</b>   | Glyma16g04830 |
|             |           | <b>FTb1</b>  | Medtr7g006630  | HQ538824    | <b>FTb</b>    | LOC101505276 | <b>GmFTa3c</b>   | Glyma16g26690 |
|             |           | <b>FTb2</b>  | Medtr7g006690  | HQ538825    |               |              | <b>GmFTa3d</b>   | Glyma02g07650 |
|             |           | <b>FTc</b>   | Medtr7g085040  | HQ538826    | <b>FTc</b>    | LOC101508200 | <b>GmFTa1/2a</b> | Glyma19g28390 |
|             |           |              |                |             |               |              | <b>GmFTa1/2b</b> | Glyma16g04840 |
|             |           |              |                |             |               |              | <b>GmFTb1</b>    | Glyma08g47820 |
|             |           |              |                |             |               |              | <b>GmFTb2</b>    | Glyma18g53670 |
|             |           |              |                |             |               |              | <b>GmFTb3</b>    | Glyma18g53680 |
|             |           |              |                |             |               |              | <b>GmFTb4</b>    | Glyma18g53690 |
|             |           |              |                |             |               |              | <b>GmFTb5</b>    | Glyma08g47810 |
|             |           |              |                |             |               |              | <b>GmFT-like</b> | Glyma08g28470 |

**Supplementary Table 5.** Information about sunrise and sunset times (h = hours, m = minutes) in Cordoba, Spain (Latitude, Longitude: 37 52 51, - 4 46 44) and Jaen, Spain (Latitude, Longitude: 37 45 59, - 3 47 21) during the growing seasons of RIP12, RIP5 and RIP8. Source: Observatorio Astronómico Nacional, Instituto Geográfico Nacional, Ministerio de Fomento, Spain.

| Cordoba, 2001 |          |        |         |        |         |        |         |        |         |        |  |
|---------------|----------|--------|---------|--------|---------|--------|---------|--------|---------|--------|--|
| Day           | February |        | March   |        | April   |        | May     |        | June    |        |  |
|               | Sunrise  | Sunset | Sunrise | Sunset | Sunrise | Sunset | Sunrise | Sunset | Sunrise | Sunset |  |
|               | h m      | h m    | h m     | h m    | h m     | h m    | h m     | h m    | h m     | h m    |  |
| 1             | 823      | 1843   | 751     | 1913   | 804     | 2042   | 723     | 2110   | 659     | 2136   |  |
| 2             | 823      | 1844   | 749     | 1914   | 803     | 2043   | 722     | 2111   | 658     | 2136   |  |
| 3             | 822      | 1845   | 748     | 1915   | 801     | 2044   | 721     | 2112   | 658     | 2137   |  |
| 4             | 821      | 1846   | 747     | 1916   | 800     | 2045   | 720     | 2112   | 658     | 2138   |  |
| 5             | 820      | 1847   | 745     | 1917   | 758     | 2046   | 719     | 2113   | 657     | 2138   |  |
| 6             | 819      | 1848   | 744     | 1918   | 757     | 2047   | 718     | 2114   | 657     | 2139   |  |
| 7             | 818      | 1849   | 742     | 1919   | 756     | 2048   | 717     | 2115   | 657     | 2139   |  |
| 8             | 817      | 1850   | 741     | 1920   | 754     | 2048   | 716     | 2116   | 657     | 2140   |  |
| 9             | 816      | 1851   | 739     | 1921   | 753     | 2049   | 715     | 2117   | 657     | 2140   |  |
| 10            | 815      | 1853   | 738     | 1921   | 751     | 2050   | 714     | 2118   | 656     | 2141   |  |
| 11            | 814      | 1854   | 736     | 1922   | 750     | 2051   | 713     | 2119   | 656     | 2141   |  |
| 12            | 812      | 1855   | 735     | 1923   | 748     | 2052   | 712     | 2120   | 656     | 2142   |  |
| 13            | 811      | 1856   | 733     | 1924   | 747     | 2053   | 711     | 2121   | 656     | 2142   |  |
| 14            | 810      | 1857   | 732     | 1925   | 745     | 2054   | 710     | 2122   | 656     | 2143   |  |
| 15            | 809      | 1858   | 730     | 1926   | 744     | 2055   | 709     | 2122   | 656     | 2143   |  |
| 16            | 808      | 1859   | 729     | 1927   | 743     | 2056   | 708     | 2123   | 656     | 2143   |  |
| 17            | 807      | 1900   | 727     | 1928   | 741     | 2057   | 707     | 2124   | 656     | 2144   |  |
| 18            | 805      | 1901   | 726     | 1929   | 740     | 2058   | 707     | 2125   | 657     | 2144   |  |
| 19            | 804      | 1902   | 724     | 1930   | 738     | 2059   | 706     | 2126   | 657     | 2144   |  |
| 20            | 803      | 1903   | 723     | 1931   | 737     | 2059   | 705     | 2127   | 657     | 2144   |  |
| 21            | 802      | 1904   | 721     | 1932   | 736     | 2100   | 704     | 2127   | 657     | 2145   |  |
| 22            | 800      | 1905   | 720     | 1933   | 734     | 2101   | 704     | 2128   | 657     | 2145   |  |
| 23            | 759      | 1906   | 718     | 1934   | 733     | 2102   | 703     | 2129   | 658     | 2145   |  |
| 24            | 758      | 1908   | 717     | 1935   | 732     | 2103   | 702     | 2130   | 658     | 2145   |  |
| 25            | 756      | 1909   | 715     | 2036   | 731     | 2104   | 702     | 2131   | 658     | 2145   |  |
| 26            | 755      | 1910   | 714     | 2037   | 729     | 2105   | 701     | 2131   | 658     | 2145   |  |
| 27            | 754      | 1911   | 712     | 2037   | 728     | 2106   | 701     | 2132   | 659     | 2145   |  |
| 28            | 752      | 1912   | 711     | 2038   | 727     | 2107   | 700     | 2133   | 659     | 2145   |  |
| 29            |          |        | 809     | 2039   | 726     | 2108   | 700     | 2134   | 700     | 2145   |  |
| 30            |          |        | 808     | 2040   | 724     | 2109   | 659     | 2134   | 700     | 2145   |  |
| 31            |          |        | 806     | 2041   |         |        | 659     | 2135   |         |        |  |

| Cordoba, 2004 |          |        |         |        |         |        |         |        |         |        |  |
|---------------|----------|--------|---------|--------|---------|--------|---------|--------|---------|--------|--|
| Day           | February |        | March   |        | April   |        | May     |        | June    |        |  |
|               | Sunrise  | Sunset | Sunrise | Sunset | Sunrise | Sunset | Sunrise | Sunset | Sunrise | Sunset |  |
|               | h m      | h m    | h m     | h m    | h m     | h m    | h m     | h m    | h m     | h m    |  |
| 1             | 824      | 1842   | 750     | 1913   | 804     | 2042   | 723     | 2110   | 658     | 2136   |  |
| 2             | 823      | 1843   | 749     | 1914   | 803     | 2043   | 722     | 2111   | 658     | 2136   |  |
| 3             | 822      | 1844   | 748     | 1915   | 801     | 2044   | 721     | 2112   | 658     | 2137   |  |
| 4             | 821      | 1845   | 746     | 1916   | 800     | 2045   | 720     | 2113   | 657     | 2138   |  |
| 5             | 820      | 1846   | 745     | 1917   | 758     | 2046   | 718     | 2114   | 657     | 2138   |  |
| 6             | 819      | 1847   | 743     | 1918   | 757     | 2047   | 717     | 2115   | 657     | 2139   |  |
| 7             | 819      | 1848   | 742     | 1919   | 755     | 2048   | 716     | 2115   | 657     | 2139   |  |
| 8             | 818      | 1849   | 740     | 1920   | 754     | 2049   | 715     | 2116   | 657     | 2140   |  |
| 9             | 816      | 1851   | 739     | 1921   | 752     | 2050   | 714     | 2117   | 656     | 2140   |  |
| 10            | 815      | 1852   | 737     | 1922   | 751     | 2051   | 713     | 2118   | 656     | 2141   |  |
| 11            | 814      | 1853   | 736     | 1923   | 749     | 2051   | 712     | 2119   | 656     | 2141   |  |
| 12            | 813      | 1854   | 734     | 1924   | 748     | 2052   | 711     | 2120   | 656     | 2142   |  |
| 13            | 812      | 1855   | 733     | 1925   | 746     | 2053   | 711     | 2121   | 656     | 2142   |  |
| 14            | 811      | 1856   | 731     | 1926   | 745     | 2054   | 710     | 2122   | 656     | 2143   |  |
| 15            | 810      | 1857   | 730     | 1927   | 744     | 2055   | 709     | 2123   | 656     | 2143   |  |
| 16            | 809      | 1858   | 728     | 1927   | 742     | 2056   | 708     | 2123   | 656     | 2143   |  |
| 17            | 807      | 1859   | 727     | 1928   | 741     | 2057   | 707     | 2124   | 656     | 2144   |  |
| 18            | 806      | 1900   | 725     | 1929   | 739     | 2058   | 706     | 2125   | 657     | 2144   |  |
| 19            | 805      | 1901   | 724     | 1930   | 738     | 2059   | 706     | 2126   | 657     | 2144   |  |
| 20            | 804      | 1903   | 722     | 1931   | 737     | 2100   | 705     | 2127   | 657     | 2145   |  |
| 21            | 803      | 1904   | 721     | 1932   | 735     | 2101   | 704     | 2128   | 657     | 2145   |  |
| 22            | 801      | 1905   | 719     | 1933   | 734     | 2102   | 704     | 2128   | 657     | 2145   |  |
| 23            | 800      | 1906   | 718     | 1934   | 733     | 2103   | 703     | 2129   | 658     | 2145   |  |
| 24            | 759      | 1907   | 716     | 1935   | 731     | 2103   | 702     | 2130   | 658     | 2145   |  |
| 25            | 757      | 1908   | 715     | 1936   | 730     | 2104   | 702     | 2131   | 658     | 2145   |  |
| 26            | 756      | 1909   | 713     | 1937   | 729     | 2105   | 701     | 2132   | 659     | 2145   |  |
| 27            | 755      | 1910   | 712     | 1938   | 728     | 2106   | 701     | 2132   | 659     | 2145   |  |
| 28            | 753      | 1911   | 710     | 2039   | 727     | 2107   | 700     | 2133   | 659     | 2145   |  |
| 29            | 752      | 1912   | 709     | 2040   | 725     | 2108   | 700     | 2134   | 700     | 2145   |  |
| 30            |          |        | 807     | 2040   | 724     | 2109   | 659     | 2134   | 700     | 2145   |  |
| 31            |          |        | 806     | 2041   |         |        | 659     | 2135   |         |        |  |

| Cordoba, 2014 |          |        |         |        |         |        |         |        |         |        |  |
|---------------|----------|--------|---------|--------|---------|--------|---------|--------|---------|--------|--|
| Day           | February |        | March   |        | April   |        | May     |        | June    |        |  |
|               | Sunrise  | Sunset | Sunrise | Sunset | Sunrise | Sunset | Sunrise | Sunset | Sunrise | Sunset |  |
|               | h m      | h m    | h m     | h m    | h m     | h m    | h m     | h m    | h m     | h m    |  |
| 1             | 823      | 1842   | 751     | 1912   | 805     | 2042   | 723     | 2110   | 659     | 2136   |  |
| 2             | 823      | 1843   | 750     | 1913   | 803     | 2043   | 722     | 2110   | 658     | 2136   |  |
| 3             | 822      | 1845   | 748     | 1914   | 802     | 2044   | 721     | 2111   | 658     | 2137   |  |
| 4             | 821      | 1846   | 747     | 1915   | 800     | 2045   | 720     | 2112   | 658     | 2137   |  |
| 5             | 820      | 1847   | 745     | 1916   | 759     | 2046   | 719     | 2113   | 657     | 2138   |  |
| 6             | 819      | 1848   | 744     | 1917   | 757     | 2046   | 718     | 2114   | 657     | 2139   |  |
| 7             | 818      | 1849   | 742     | 1918   | 756     | 2047   | 717     | 2115   | 657     | 2139   |  |
| 8             | 817      | 1850   | 741     | 1919   | 754     | 2048   | 716     | 2116   | 657     | 2140   |  |
| 9             | 816      | 1851   | 740     | 1920   | 753     | 2049   | 715     | 2117   | 657     | 2140   |  |
| 10            | 815      | 1852   | 738     | 1921   | 751     | 2050   | 714     | 2118   | 656     | 2141   |  |
| 11            | 814      | 1853   | 737     | 1922   | 750     | 2051   | 713     | 2119   | 656     | 2141   |  |
| 12            | 813      | 1855   | 735     | 1923   | 748     | 2052   | 712     | 2120   | 656     | 2142   |  |
| 13            | 811      | 1856   | 734     | 1924   | 747     | 2053   | 711     | 2121   | 656     | 2142   |  |
| 14            | 810      | 1857   | 732     | 1925   | 746     | 2054   | 710     | 2122   | 656     | 2143   |  |
| 15            | 809      | 1858   | 731     | 1926   | 744     | 2055   | 709     | 2123   | 656     | 2143   |  |
| 16            | 808      | 1859   | 729     | 1927   | 743     | 2056   | 708     | 2123   | 656     | 2143   |  |
| 17            | 807      | 1900   | 728     | 1928   | 741     | 2057   | 707     | 2124   | 656     | 2144   |  |
| 18            | 806      | 1901   | 726     | 1929   | 740     | 2058   | 707     | 2125   | 657     | 2144   |  |
| 19            | 804      | 1902   | 724     | 1930   | 739     | 2058   | 706     | 2126   | 657     | 2144   |  |
| 20            | 803      | 1903   | 723     | 1931   | 737     | 2059   | 705     | 2126   | 657     | 2144   |  |
| 21            | 802      | 1904   | 721     | 1932   | 736     | 2100   | 705     | 2127   | 657     | 2145   |  |
| 22            | 800      | 1905   | 720     | 1933   | 735     | 2101   | 704     | 2128   | 657     | 2145   |  |
| 23            | 759      | 1906   | 718     | 1934   | 733     | 2102   | 703     | 2129   | 658     | 2145   |  |
| 24            | 758      | 1907   | 717     | 1935   | 732     | 2103   | 703     | 2130   | 658     | 2145   |  |
| 25            | 756      | 1908   | 715     | 1935   | 731     | 2104   | 702     | 2130   | 658     | 2145   |  |
| 26            | 755      | 1909   | 714     | 1936   | 729     | 2105   | 701     | 2131   | 658     | 2145   |  |
| 27            | 754      | 1910   | 712     | 1937   | 728     | 2106   | 701     | 2132   | 659     | 2145   |  |
| 28            | 752      | 1911   | 711     | 1938   | 727     | 2107   | 700     | 2133   | 659     | 2145   |  |
| 29            |          |        | 709     | 1939   | 726     | 2108   | 700     | 2133   | 700     | 2145   |  |
| 30            |          |        | 808     | 2040   | 725     | 2109   | 659     | 2134   | 700     | 2145   |  |
| 31            |          |        | 806     | 2041   |         |        | 659     | 2135   |         |        |  |

| Cordoba, 2003 |          |        |         |        |         |        |         |        |         |        |  |
|---------------|----------|--------|---------|--------|---------|--------|---------|--------|---------|--------|--|
| Day           | February |        | March   |        | April   |        | May     |        | June    |        |  |
|               | Sunrise  | Sunset | Sunrise | Sunset | Sunrise | Sunset | Sunrise | Sunset | Sunrise | Sunset |  |
|               | h m      | h m    | h m     | h m    | h m     | h m    | h m     | h m    | h m     | h m    |  |
| 1             | 824      | 1842   | 752     | 1912   | 805     | 2042   | 724     | 2109   | 659     | 2135   |  |
| 2             | 823      | 1843   | 750     | 1913   | 804     | 2043   | 723     | 2110   | 658     | 2136   |  |
| 3             | 822      | 1844   | 749     | 1914   | 802     | 2043   | 722     | 2111   | 658     | 2137   |  |
| 4             | 821      | 1845   | 747     | 1915   | 801     | 2044   | 720     | 2112   | 658     | 2137   |  |
| 5             | 820      | 1846   | 746     | 1916   | 759     | 2045   | 719     | 2113   | 657     | 2138   |  |
| 6             | 819      | 1848   | 744     | 1917   | 758     | 2046   | 718     | 2114   | 657     | 2138   |  |
| 7             | 818      | 1849   | 743     | 1918   | 756     | 2047   | 717     | 2115   | 657     | 2139   |  |
| 8             | 817      | 1850   | 742     | 1919   | 755     | 2048   | 716     | 2116   | 657     | 2140   |  |
| 9             | 816      | 1851   | 740     | 1920   | 753     | 2049   | 715     | 2117   | 657     | 2140   |  |
| 10            | 815      | 1852   | 739     | 1921   | 752     | 2050   | 714     | 2117   | 656     | 2141   |  |
| 11            | 814      | 1853   | 737     | 1922   | 750     | 2051   | 713     | 2118   | 656     | 2141   |  |
| 12            | 813      | 1854   | 736     | 1923   | 749     | 2052   | 712     | 2119   | 656     | 2142   |  |
| 13            | 812      | 1855   | 734     | 1924   | 748     | 2053   | 711     | 2120   | 656     | 2142   |  |
| 14            | 811      | 1856   | 733     | 1924   | 746     | 2054   | 710     | 2121   | 656     | 2143   |  |
| 15            | 810      | 1857   | 731     | 1925   | 745     | 2054   | 710     | 2122   | 656     | 2143   |  |
| 16            | 809      | 1857   | 730     | 1926   | 744     | 2055   | 709     | 2123   | 656     | 2143   |  |
| 17            | 808      | 1859   | 730     | 1927   | 743     | 2055   | 709     | 2123   | 656     | 2143   |  |
| 18            | 807      | 1900   | 728     | 1928   | 742     | 2056   | 708     | 2124   | 656     | 2144   |  |
| 19            | 806      | 1901   | 727     | 1929   | 740     | 2057   | 707     | 2124   | 656     | 2144   |  |
| 20            | 805      | 1902   | 725     | 1930   | 739     | 2058   | 706     | 2125   | 657     | 2144   |  |
| 21            | 803      | 1903   | 724     | 1931   | 738     | 2059   | 705     | 2126   | 657     | 2144   |  |
| 22            | 802      | 1904   | 722     | 1931   | 736     | 2100   | 705     | 2127   | 657     | 2145   |  |
| 23            | 801      | 1905   | 720     | 1932   | 735     | 2101   | 704     | 2128   | 657     | 2145   |  |
| 24            | 800      | 1906   | 719     | 1933   | 734     | 2102   | 703     | 2129   | 658     | 2145   |  |
| 25            | 758      | 1907   | 717     | 1934   | 732     | 2103   | 703     | 2129   | 658     | 2145   |  |
| 26            | 757      | 1908   | 716     | 1935   | 731     | 2104   | 702     | 2130   | 658     | 2145   |  |
| 27            | 756      | 1909   | 714     | 1936   | 730     | 2105   | 702     | 2130   | 658     | 2145   |  |
| 28            | 754      | 1910   | 713     | 1937   | 729     | 2106   | 701     | 2132   | 659     | 2145   |  |
| 29            | 753      | 1911   | 711     | 1938   | 727     | 2106   | 701     | 2132   | 659     | 2145   |  |
| 30            |          |        | 710     | 1939   | 726     | 2107   | 700     | 2133   | 659     | 2145   |  |
| 31            |          |        | 808     | 2040   | 725     | 2108   | 700     | 2134   | 700     | 2145   |  |
|               |          |        | 807     | 2041   |         | 659    | 2135    |        |         |        |  |

| Cordoba, 2008 |          |        |         |        |         |        |         |        |         |        |  |
|---------------|----------|--------|---------|--------|---------|--------|---------|--------|---------|--------|--|
| Day           | February |        | March   |        | April   |        | May     |        | June    |        |  |
|               | Sunrise  | Sunset | Sunrise | Sunset | Sunrise | Sunset | Sunrise | Sunset | Sunrise | Sunset |  |
|               | h m      | h m    | h m     | h m    | h m     | h m    | h m     | h m    | h m     | h m    |  |
| 1             | 824      | 1842   | 750     | 1913   | 804     | 2042   | 723     | 2110   | 658     | 2136   |  |
| 2             | 823      | 1843   | 749     | 1914   | 803     | 2043   | 722     | 2111   | 658     | 2137   |  |
| 3             | 822      | 1844   | 748     | 1915   | 801     | 2044   | 721     | 2112   | 658     | 2137   |  |
| 4             | 821      | 1845   | 746     | 1916   | 800     | 2045   | 720     | 2113   | 658     | 2138   |  |
| 5             | 820      | 1846   | 745     | 1917   | 758     | 2046   | 718     | 2114   | 657     | 2138   |  |
| 6             | 819      | 1847   | 743     | 1918   | 757     | 2047   | 717     | 2115   | 657     | 2139   |  |
| 7             | 818      | 1848   | 742     | 1919   | 755     | 2048   | 716     | 2116   | 657     | 2139   |  |
| 8             | 817      | 1850   | 740     | 1920   | 754     | 2049   | 715     | 2116   | 657     | 2140   |  |
| 9             | 816      | 1851   | 739     | 1921   | 752     | 2050   | 714     | 2117   | 657     | 2141   |  |
| 10            | 815      | 1852   | 737     | 1922   | 751     | 2051   | 713     | 2118   | 656     | 2141   |  |
| 11            | 814      | 1853   | 736     | 1923   | 749     | 2052   | 712     | 2119   | 656     | 2142   |  |
| 12            | 813      | 1854   | 734     | 1924   | 748     | 2052   | 711     | 2120   | 656     | 2142   |  |
| 13            | 812      | 1855   | 733     | 1925   | 746     | 2053   | 711     | 2121   | 656     | 2143   |  |
| 14            | 811      | 1856   | 731     | 1926   | 745     | 2054   | 710     | 2122   | 656     | 2143   |  |
| 15            | 810      | 1857   | 730     | 1927   | 744     | 2055   | 709     | 2123   | 656     | 2143   |  |
| 16            | 809      | 1858   | 728     | 1928   | 742     | 2056   | 708     | 2123   | 656     | 2143   |  |
| 17            | 807      | 1859   | 727     | 1928   | 741     | 2057   | 707     | 2124   | 656     | 2144   |  |
| 18            | 806      | 1900   | 725     | 1929   | 739     | 2058   | 706     | 2125   | 657     | 2144   |  |
| 19            | 805      | 1902   | 724     | 1930   | 738     | 2059   | 706     | 2126   | 657     | 2144   |  |
| 20            | 804      | 1903   | 722     | 1931   | 737     | 2100   | 705     | 2127   | 657     | 2145   |  |
| 21            | 802      | 1904   | 721     | 1932   | 735     | 2101   | 704     | 2128   | 657     | 2145   |  |
| 22            | 801      | 1905   | 719     | 1933   | 734     | 2102   | 704     | 2128   | 657     | 2145   |  |
| 23            | 800      | 1906   | 718     | 1934   | 733     | 2103   | 703     | 2129   | 658     | 2145   |  |
| 24            | 759      | 1907   | 716     | 1935   | 731     | 2104   | 702     | 2130   | 658     | 2145   |  |
| 25            | 757      | 1908   | 715     | 1936   | 730     | 2104   | 702     | 2131   | 658     | 2145   |  |
| 26            | 756      | 1909   | 713     | 1937   | 729     | 2105   | 701     | 2132   | 659     | 2145   |  |
| 27            | 755      | 1910   | 712     | 1938   | 728     | 2106   | 701     | 2132   | 659     | 2145   |  |
| 28            | 753      | 1911   | 710     | 1939   | 726     | 2107   | 700     | 2133   | 659     | 2145   |  |
| 29            | 752      | 1912   | 709     | 1940   | 725     | 2108   | 700     | 2134   | 700     | 2145   |  |
| 30            |          |        | 807     | 2041   | 724     | 2109   | 659     | 2134   | 700     | 2145   |  |
| 31            |          |        | 806     | 2041   |         | 659    | 2135    |        |         |        |  |

| Jaen, 2003 |          |        |         |        |         |        |         |        |         |        |  |
|------------|----------|--------|---------|--------|---------|--------|---------|--------|---------|--------|--|
| Day        | February |        | March   |        | April   |        | May     |        | June    |        |  |
|            | Sunrise  | Sunset | Sunrise | Sunset | Sunrise | Sunset | Sunrise | Sunset | Sunrise | Sunset |  |
|            | h m      | h m    | h m     | h m    | h m     | h m    | h m     | h m    | h m     | h m    |  |
| 1          | 820      | 1838   | 747     | 1908   | 801     | 2038   | 720     | 2105   | 655     | 2131   |  |
| 2          | 819      | 1839   | 746     | 1909   | 800     | 2039   | 719     | 2106   | 655     | 2132   |  |
| 3          | 818      | 1840   | 745     | 1910   | 758     | 2039   | 718     | 2107   | 654     | 2132   |  |
| 4          | 817      | 1842   | 743     | 1911   | 757     | 2040   | 717     | 2108   | 654     | 2133   |  |
| 5          | 816      | 1843   | 742     | 1912   | 755     | 2041   | 716     | 2109   | 654     | 2134   |  |
| 6          | 815      | 1844   | 740     | 1913   | 754     | 2042   | 715     | 2110   | 654     | 2134   |  |
| 7          | 814      | 1845   | 739     | 1914   | 752     | 2043   | 713     | 2111   | 653     | 2135   |  |
| 8          | 813      | 1846   | 737     | 1915   | 751     | 2044   | 712     | 2111   | 653     | 2135   |  |
| 9          | 812      | 1847   | 736     | 1916   | 749     | 2045   | 711     | 2112   | 653     | 2136   |  |
| 10         | 811      | 1848   | 735     | 1917   | 748     | 2046   | 710     | 2113   | 653     | 2136   |  |
| 11         | 810      | 1849   | 733     | 1918   | 747     | 2047   | 709     | 2114   | 653     | 2137   |  |
| 12         | 809      | 1850   | 732     | 1919   | 745     | 2048   | 708     | 2115   | 653     | 2137   |  |
| 13         | 808      | 1852   | 730     | 1920   | 744     | 2049   | 708     | 2116   | 653     | 2138   |  |
| 14         | 807      | 1853   | 729     | 1921   | 742     | 2049   | 707     | 2117   | 653     | 2138   |  |
| 15         | 806      | 1854   | 727     | 1922   | 740     | 2050   | 706     | 2118   | 653     | 2139   |  |
| 16         | 804      | 1855   | 726     | 1923   | 739     | 2051   | 705     | 2119   | 653     | 2139   |  |
| 17         | 803      | 1856   | 724     | 1924   | 738     | 2052   | 704     | 2119   | 653     | 2139   |  |
| 18         | 802      | 1857   | 723     | 1925   | 737     | 2053   | 703     | 2120   | 653     | 2140   |  |
| 19         | 801      | 1858   | 721     | 1926   | 735     | 2054   | 703     | 2121   | 653     | 2140   |  |
| 20         | 759      | 1859   | 720     | 1927   | 734     | 2055   | 702     | 2122   | 653     | 2140   |  |
| 21         | 758      | 1900   | 718     | 1927   | 733     | 2056   | 701     | 2123   | 653     | 2140   |  |
| 22         | 757      | 1901   | 717     | 1928   | 731     | 2057   | 700     | 2124   | 654     | 2141   |  |
| 23         | 756      | 1902   | 715     | 1929   | 730     | 2058   | 700     | 2124   | 654     | 2141   |  |
| 24         | 754      | 1903   | 713     | 1930   | 729     | 2059   | 659     | 2125   | 654     | 2141   |  |
| 25         | 753      | 1904   | 712     | 1931   | 727     | 2100   | 659     | 2126   | 654     | 2141   |  |
| 26         | 752      | 1905   | 710     | 1932   | 726     | 2100   | 658     | 2127   | 655     | 2141   |  |
| 27         | 750      | 1906   | 709     | 1933   | 725     | 2101   | 657     | 2127   | 655     | 2141   |  |
| 28         | 749      | 1907   | 707     | 1934   | 724     | 2102   | 657     | 2128   | 655     | 2141   |  |
| 29         |          |        | 706     | 1935   | 722     | 2103   | 656     | 2129   | 656     | 2141   |  |
| 30         |          |        | 804     | 2036   | 721     | 2104   | 656     | 2130   | 656     | 2141   |  |
| 31         |          |        | 803     | 2037   |         | 656    | 2130    |        |         |        |  |
